# Supplementary material
Source: PubMed Central journal article supplement (PMC7397555)
Supplement: NIHMS1612289-supplement-Supp_Materials.pdf [file NIHMS1612289-supplement-Supp_Materials.pdf]

## **Online Supplemental Material**

**e Table 1. PubMed search strategy**

| N  | Search Terms                                                  | Records |
|----|---------------------------------------------------------------|---------|
| 1  | Lipid AND Lowering                                            | 4809    |
| 2  | LDL AND Lowering                                              | 2491    |
| 3  | Cholesterol AND Lowering                                      | 3663    |
| 4  | Statin AND Cholesterol                                        | 4139    |
| 5  | Statin AND LDL                                                | 3152    |
| 6  | Statin AND Lipid                                              | 5022    |
| 7  | Ezetimibe AND Cholesterol                                     | 471     |
| 8  | Ezetimibe AND LDL                                             | 423     |
| 9  | Ezetimibe AND Lipid                                           | 493     |
| 10 | Proprotein convertase subtilisin/kexin type 9 AND Cholesterol | 102     |
| 11 | Proprotein convertase subtilisin/kexin type 9 AND LDL         | 96      |
| 12 | Proprotein convertase subtilisin/kexin type 9 AND Lipid       | 97      |

e Table 2. Risk of bias in the included trials as assessed by the Cochrane risk of bias assessment scale

| Studies                        | Randomization | Allocation concealment | Blinding (Physician/Patient) | Adjudication of outcomes | Selective outcome reporting | Incomplete data reporting addressed ? | Free of other bias ? |
|--------------------------------|---------------|------------------------|------------------------------|--------------------------|-----------------------------|---------------------------------------|----------------------|
| STATIN                         |               |                        |                              |                          |                             |                                       |                      |
| 4S                             | Yellow        | Green                  | Green                        | Green                    | Green                       | Green                                 | Red                  |
| WOSCOPS <sup>1</sup>           | Green         | Yellow                 | Green                        | Green                    | Green                       | Green                                 | Green                |
| CARE <sup>2</sup>              | Green         | Yellow                 | Green                        | Green                    | Green                       | Green                                 | Yellow               |
| AFCAPS/TexCAPS <sup>3</sup>    | Green         | Yellow                 | Green                        | Green                    | Green                       | Green                                 | Green                |
| GISSI-P <sup>4</sup>           | Yellow        | Yellow                 | Yellow                       | Yellow                   | Yellow                      | Green                                 | Red                  |
| ALLHAT-LLT <sup>5</sup>        | Green         | Red                    | Red                          | Red                      | Green                       | Green                                 | Red                  |
| GREACE <sup>6</sup>            | Yellow        | Red                    | Red                          | Red                      | Green                       | Yellow                                | Red                  |
| HPS <sup>7</sup>               | Green         | Green                  | Green                        | Green                    | Green                       | Green                                 | Red                  |
| PROSPER <sup>8</sup>           | Green         | Green                  | Green                        | Green                    | Yellow                      | Green                                 | Green                |
| ALERT <sup>9</sup>             | Green         | Yellow                 | Green                        | Green                    | Green                       | Green                                 | Red                  |
| ASCOT-LLA <sup>10</sup>        | Green         | Yellow                 | Green                        | Green                    | Green                       | Yellow                                | Red                  |
| PROVE-IT TIMI 22 <sup>11</sup> | Yellow        | Green                  | Green                        | Green                    | Green                       | Green                                 | Red                  |
| CARDS <sup>12</sup>            | Green         | Green                  | Green                        | Green                    | Green                       | Green                                 | Red                  |
| IDEAL <sup>13</sup>            | Green         | Green                  | Red                          | Green                    | Green                       | Green                                 | Red                  |
| TNT <sup>14</sup>              | Green         | Green                  | Yellow                       | Green                    | Green                       | Green                                 | Green                |
| MEGA <sup>15</sup>             | Yellow        | Red                    | Green                        | Green                    | Red                         | Red                                   | Yellow               |
| ASPEN <sup>16</sup>            | Green         | Yellow                 | Green                        | Green                    | Yellow                      | Green                                 | Green                |
| SPARCL <sup>17</sup>           | Green         | Green                  | Green                        | Green                    | Green                       | Green                                 | Red                  |
| JUPITER <sup>18</sup>          | Yellow        | Green                  | Green                        | Green                    | Green                       | Green                                 | Red                  |
| SEARCH <sup>19</sup>           | Green         | Yellow                 | Green                        | Green                    | Green                       | Green                                 | Green                |
| HOPE 3 <sup>20</sup>           | Green         | Yellow                 | Yellow                       | Green                    | Green                       | Green                                 | Red                  |
| EZETIMIBE + STATIN             |               |                        |                              |                          |                             |                                       |                      |
| SEAS <sup>21</sup>             | Green         | Green                  | Yellow                       | Green                    | Yellow                      | Green                                 | Green                |

|                                 |  |  |  |  |  |  |  |
|---------------------------------|--|--|--|--|--|--|--|
| SHARP <sup>22</sup>             |  |  |  |  |  |  |  |
| IMPROVE IT <sup>23</sup>        |  |  |  |  |  |  |  |
| PCSK9 INHIBITOR                 |  |  |  |  |  |  |  |
| ODYSSEY LONG TERM <sup>24</sup> |  |  |  |  |  |  |  |
| SPIRE 1 <sup>25</sup>           |  |  |  |  |  |  |  |
| SPIRE 2 <sup>25</sup>           |  |  |  |  |  |  |  |
| FOURIER <sup>26</sup>           |  |  |  |  |  |  |  |
| ODYSSEY OUTCOMES <sup>27</sup>  |  |  |  |  |  |  |  |

Green (low risk); yellow (unclear risk); Red (high risk); 4S (SSSS), Scandinavian Simvastatin Survival Study; ALLHAT-LLT, AFCAPS-TexCAPS, Air Force/Texas Coronary Atherosclerosis Prevention Study; ALERT, Assessment of LEscol in Renal Transplantation Study; ASCOT-LLA, Anglo-Scandinavian Cardiac Outcomes Trial–Lipid Lowering Arm; ASPEN, Atorvastatin Study for Prevention of Coronary Heart Disease Endpoints in Non-Insulin-Dependent Diabetes Mellitus; CARE, Cholesterol And Recurrent Events; CARDS, Collaborative Atorvastatin Diabetes Study; FOURIER, Further Cardiovascular Outcomes Research with PCSK9 Inhibition in Subjects with Elevated Risk; GISSI-P, Gruppo Italiano per lo Studio della Sopravvivenza nell’Infarto Miocardico; HOPE-3, Heart Outcomes Prevention Evaluation; GREACE, The GREek Atorvastatin and Coronary-heart-disease Evaluation Study; HPS, Heart Protection Study; IDEAL, Incremental Decrease in End Points Through Aggressive Lipid Lowering Study Group; IMPROVE-IT, Improved Reduction of Outcomes: Vytorin Efficacy International Trial; JUPITER, Justification for the Use of Statins in Prevention: an Intervention Trial Evaluating Rosuvastatin study group; LIPID, Long–term Intervention with Pravastatin in Ischaemic Disease; MEGA, Management of Elevated Cholesterol in the Primary Prevention Group of Adult Japanese Study Group; ODYSSEY LONG TERM, Long-term Safety and Tolerability of Alirocumab in High Cardiovascular Risk Patients with Hypercholesterolemia Not Adequately Controlled with Their Lipid Modifying Therapy; ODYSSEY Outcomes, Evaluation of Cardiovascular Outcomes After an Acute Coronary Syndrome During Treatment With Alirocumab; ; PROVE IT-TIMI 22, the Pravastatin or Atorvastatin Evaluation and Infection Therapy; PROSPER, SEARCH, Study of the Effectiveness of Additional Reductions in Cholesterol and Homocysteine; SEAS, Simvastatin and Ezetimibe in Aortic Stenosis; SHARP, Study of Heart and Renal Protection; SPARCL, The Stroke Prevention by Aggressive Reduction in Cholesterol Levels; SPIRE 1 & 2, Studies of PCSK9 Inhibition and the Reduction of Vascular Events 1 & 2; TNT, Treating to New Targets; WOSCOPS, West of Scotland Coronary Prevention Study

**e Table 3. Definition of cerebrovascular events**

| <b>Trial name</b>                 | <b>Setting</b> | <b>Year</b> | <b>Definition</b>                                     |
|-----------------------------------|----------------|-------------|-------------------------------------------------------|
| <b>STATIN</b>                     |                |             |                                                       |
| 4S <sup>28</sup>                  | Secondary      | 1994        | Any cerebrovascular event                             |
| WOSCOPS <sup>1</sup>              | Primary        | 1995        | Fatal or non fatal stroke                             |
| AFCAPS-TextCAPS <sup>3</sup>      | Primary        | 1997        | Total stroke                                          |
| GISSI-P <sup>4</sup>              | Secondary      | 2000        | Fatal or non fatal stroke                             |
| ALLHAT-LLT <sup>5</sup>           | Primary        | 2002        | Fatal or non fatal stroke                             |
| HPS <sup>7</sup>                  | Secondary      | 2002        | Any stroke                                            |
| PROSPER <sup>8</sup>              | Primary        | 2002        | Fatal or non fatal stroke                             |
| ALERT <sup>9</sup>                | Primary        | 2003        | Fatal or nonfatal stroke or transient ischemic attack |
| ASCOT-LLA <sup>10</sup>           | Primary        | 2003        | Fatal or non fatal stroke                             |
| PROVE IT-TIMI 22 <sup>11</sup>    | Secondary      | 2004        | Stroke                                                |
| CARDS <sup>12</sup>               | Primary        | 2004        | Stroke                                                |
| IDEAL <sup>13</sup>               | Secondary      | 2005        | Fatal or nonfatal stroke                              |
| TNT <sup>14</sup>                 | Secondary      | 2005        | Fatal or nonfatal stroke or transient ischemic attack |
| MEGA <sup>15</sup>                | Primary        | 2006        | Any stroke                                            |
| ASPEN <sup>16</sup>               | Primary        | 2006        | Fatal or non fatal stroke                             |
| SPARCL <sup>17</sup>              | Secondary      | 2006        | Fatal or nonfatal stroke                              |
| JUPITER <sup>18</sup>             | Primary        | 2008        | Any stroke                                            |
| SEARCH <sup>19</sup>              | Secondary      | 2010        | Total Stroke                                          |
| HOPE 3 <sup>20</sup>              | Primary        | 2016        | Stroke                                                |
| <b>EZETIMIBE + STATIN</b>         |                |             |                                                       |
| SEAS <sup>21</sup>                | Primary        | 2008        | Nonhaemorrhagic stroke                                |
| SHARP <sup>22</sup>               | Primary        | 2011        | Haemorrhagic or nonhaemorrhagic stroke                |
| IMPROVE IT <sup>23</sup>          | Secondary      | 2015        | Any stroke                                            |
| <b>PCSK9 INHIBITOR</b>            |                |             |                                                       |
| ODYSSEY<br>LONGTERM <sup>24</sup> | Secondary      | 2015        | Fatal or nonfatal ischemic stroke                     |
| FOURIER <sup>26</sup>             | Secondary      | 2017        | Total Stroke                                          |

|                                   |           |      |                                   |
|-----------------------------------|-----------|------|-----------------------------------|
| SPIRE 1 <sup>25</sup>             | Secondary | 2017 | Nonfatal Stroke                   |
| SPIRE 2 <sup>25</sup>             | Secondary | 2017 | Nonfatal Stroke                   |
| ODYSSEY<br>OUTCOMES <sup>27</sup> | Secondary | 2018 | Fatal or nonfatal ischemic stroke |

e Table 4. Definition of major adverse cardiovascular events (MACE)

| Trial name                     | Setting   | Year | Definition                                                                                                                                                                                                     |
|--------------------------------|-----------|------|----------------------------------------------------------------------------------------------------------------------------------------------------------------------------------------------------------------|
| STATIN                         |           |      |                                                                                                                                                                                                                |
| 4S <sup>28</sup>               | Secondary | 1994 | Coronary death, nonfatal definite or probable MI, silent MI, or resuscitated cardiac arrest                                                                                                                    |
| WOSCOPS <sup>1</sup>           | Primary   | 1995 | Cardiovascular death, nonfatal myocardial infarction, readmission for ACS, and stroke                                                                                                                          |
| AFCAPS-TexCAPS <sup>3</sup>    | Primary   | 1997 | Fatal or nonfatal MI, unstable angina, or sudden cardiac death                                                                                                                                                 |
| GISSI-P <sup>4</sup>           | Secondary | 2000 | Cumulative rate of total mortality, non-fatal MI, and stroke                                                                                                                                                   |
| HPS <sup>7</sup>               | Secondary | 2002 | Coronary death, nonfatal MI, stroke, revascularization                                                                                                                                                         |
| PROSPER <sup>8</sup>           | Primary   | 2002 | Death from CHD or nonfatal MI or fatal or non-fatal stroke                                                                                                                                                     |
| ALERT <sup>9</sup>             | Primary   | 2003 | Cardiac death, non-fatal MI, or coronary revascularization procedure, including coronary-artery bypass graft or percutaneous coronary intervention                                                             |
| ASCOT-LLA <sup>10</sup>        | Primary   | 2003 | Total cardiovascular events and procedures                                                                                                                                                                     |
| PROVE IT-TIMI 22 <sup>11</sup> | Secondary | 2004 | Death from any cause, myocardial infarction, documented unstable angina requiring rehospitalization, revascularization (performed at least 30 days after randomization), and stroke                            |
| CARDS <sup>12</sup>            | Primary   | 2004 | Acute coronary heart disease events, coronary revascularization, or stroke                                                                                                                                     |
| IDEAL <sup>13</sup>            | Secondary | 2005 | CHD death, nonfatal MI, cardiac arrest with resuscitation and stroke                                                                                                                                           |
| TNT <sup>14</sup>              | Secondary | 2005 | Death from CHD, nonfatal non-procedure related myocardial infarction, resuscitation after cardiac arrest, or fatal or nonfatal stroke                                                                          |
| MEGA <sup>15</sup>             | Primary   | 2006 | Coronary heart disease                                                                                                                                                                                         |
| ASPEN <sup>16</sup>            | Primary   | 2006 | Cardiovascular death, nonfatal myocardial infarction, nonfatal stroke, recanalization, coronary artery bypass surgery, resuscitated cardiac arrest, and worsening or unstable angina requiring hospitalization |
| SPARCL <sup>17</sup>           |           | 2006 | Death from cardiac causes, nonfatal MI, resuscitation after cardiac arrest, nonfatal or fatal stroke                                                                                                           |
| JUPITER <sup>18</sup>          | Primary   | 2008 | Myocardial infarction, stroke, arterial revascularization, hospitalization for unstable angina, or death from cardiovascular causes                                                                            |

|                                |           |      |                                                                                                                                                                                                 |
|--------------------------------|-----------|------|-------------------------------------------------------------------------------------------------------------------------------------------------------------------------------------------------|
| SEARCH <sup>19</sup>           |           | 2010 | Coronary death, myocardial infarction, stroke, or arterial revascularization                                                                                                                    |
| HOPE 3 <sup>20</sup>           | Primary   | 2016 | Death from cardiovascular causes, nonfatal MI, or nonfatal stroke                                                                                                                               |
| EZETIMIBE + STATIN             |           |      |                                                                                                                                                                                                 |
| SEAS <sup>21</sup>             | Primary   | 2008 | Death from cardiovascular causes, aortic-valve replacement, nonfatal myocardial infarction, hospitalization for unstable angina pectoris, heart failure, CABG, PCI, and non-hemorrhagic stroke. |
| SHARP <sup>22</sup>            | Primary   | 2011 | Non-fatal myocardial infarction or coronary death, non-haemorrhagic stroke, or any arterial revascularisation procedure                                                                         |
| IMPROVE IT <sup>23</sup>       | Secondary | 2015 |                                                                                                                                                                                                 |
| PCSK9 INHIBITOR                |           |      |                                                                                                                                                                                                 |
| ODYSSEY LONGTERM <sup>24</sup> | Secondary | 2015 | Death from coronary heart disease, nonfatal myocardial infarction, fatal or nonfatal ischemic stroke, and unstable angina requiring hospitalization                                             |
| FOURIER <sup>26</sup>          | Secondary | 2017 | Cardiovascular death, myocardial infarction, stroke, hospitalization for unstable angina, or coronary revascularization                                                                         |
| SPIRE 1 <sup>25</sup>          | Secondary | 2017 | Nonfatal myocardial infarction, nonfatal stroke, hospitalization for unstable angina requiring urgent revascularization, or cardiovascular death                                                |
| SPIRE 2 <sup>25</sup>          | Secondary | 2017 | Nonfatal myocardial infarction, nonfatal stroke, hospitalization for unstable angina requiring urgent revascularization, or cardiovascular death                                                |
| ODYSSEY OUTCOMES <sup>27</sup> | Secondary | 2018 | Death from coronary heart disease, nonfatal myocardial infarction, fatal or nonfatal ischemic stroke, or unstable angina requiring hospitalization.                                             |



**e Table 5. Multivariate meta-regression models for the associations of BMI with cardiovascular outcomes**

| Outcome                  | Studies | Patients | BMI (Kg/m <sup>2</sup> ) | Multivariate Models                |                                              |                                                   |                                           |
|--------------------------|---------|----------|--------------------------|------------------------------------|----------------------------------------------|---------------------------------------------------|-------------------------------------------|
|                          |         |          |                          | Adjusted for Baseline LDL-C, mg/dL | Adjusted for Absolute LDL-C Reduction, mg/dL | Adjusted for Percentage Reduction in LDL-C, mg/dL | Adjusted for Age, Gender and Risk Profile |
| Cardiovascular mortality | 29      | 265766   | 1.07 [1.02-1.13]         | 1.04 [0.99-1.10]                   | 1.05 [1.01-1.11]                             | 1.09 [1.04-1.14]                                  | 1.06 [1.01-1.12]                          |
| All-cause mortality      | 29      | 265766   | 1.03 [0.99-1.06]         | 1.00 [0.97-1.04]                   | 1.02 [0.97-1.05]                             | 1.03 [1.00-1.07]                                  | 1.02 [0.98-1.05]                          |
| Myocardial infarction    | 29      | 265766   | 1.06 [1.02-1.09]         | 1.04 [0.99-1.09]                   | 1.04 [1.01-1.08]                             | 1.07 [1.03-1.10]                                  | 1.06 [1.02-1.09]                          |
| Revascularization        | 29      | 265766   | 1.08 [1.03-1.12]         | 1.07 [1.01-1.13]                   | 1.07 [1.03-1.11]                             | 1.10 [1.05-1.14]                                  | 1.07 [1.02-1.12]                          |
| Cerebrovascular events   | 29      | 265766   | 0.99 [0.94-1.03]         | 0.98 [0.93-1.03]                   | 0.97 [0.93-1.02]                             | 0.99 [0.94-1.03]                                  | 0.98 [0.93-1.03]                          |
| MACE                     | 29      | 265766   | 1.04 [1.01-1.07]         | 1.02 [0.98-1.06]                   | 1.03 [1.00-1.06]                             | 1.05 [1.02-1.08]                                  | 1.02 [1.00-1.05]                          |

Absolute reduction in low-density lipoprotein cholesterol (LDL-C) refers to between-group differences achieved in LDL-C (each 38.7 mg/dL). Percentage reduction refers to 10% reduction in active arm compared with control. Risk profile was categorized as low/moderate risk vs high risk defined as diabetes, chronic kidney disease, recent acute coronary syndrome or revascularization or C- reactive protein  $\geq 2$  mg/L.

**e Table 6. Meta-regression models for the associations of LDL-C parameters with cardiovascular outcomes**

| <b>Outcome</b>           | <b>Studies</b> | <b>Patients</b> | <b>Baseline LDL-C, mg/dL</b> | <b>Absolute Reduction in LDL-C, mg/dL</b> |
|--------------------------|----------------|-----------------|------------------------------|-------------------------------------------|
| Cardiovascular mortality | 29             | 265766          | 0.87 [0.81-0.94]             | 0.79 [0.72-0.87]                          |
| All-cause mortality      | 29             | 265766          | 0.92 [0.88-0.97]             | 0.90 [0.83-0.98]                          |
| Myocardial infarction    | 29             | 265766          | 0.92 [0.87-0.97]             | 0.83 [0.77-0.90]                          |
| Revascularization        | 29             | 265766          | 0.90 [0.84-0.97]             | 0.83 [0.74-0.94]                          |
| Cerebrovascular events   | 29             | 265766          | 1.01 [0.93-1.08]             | 0.89 [0.79-0.99]                          |
| MACE                     | 29             | 265766          | 0.92 [0.87-0.97]             | 0.88 [0.81-0.96]                          |

Absolute reduction in low-density lipoprotein cholesterol (LDL-C) refers to between-group differences achieved in LDL-C (each 38.7 mg/dL). Baseline LDL-C represents change in RR for every 38.7 mg/dL increase in baseline LDL-C values.

**e Table 7: Analysis stratified according to baseline LDL-C, absolute LDL-C reduction and percentage reduction in LDL-C in relation to BMI**

|                                    |         | HAZARD RATIO [95% CI]     |                          |                     |                       |                   |                        |                  |
|------------------------------------|---------|---------------------------|--------------------------|---------------------|-----------------------|-------------------|------------------------|------------------|
| Baseline LDL-C, mg/dL              |         |                           |                          |                     |                       |                   |                        |                  |
| BMI, Kg/m <sup>2</sup>             |         | No. of Studies (Patients) | Cardiovascular mortality | All-cause mortality | Myocardial infarction | Revascularisation | Cerebrovascular events | MACE             |
| <25                                | <100    | 0                         | NA                       | 0                   | NA                    | 0                 | NA                     | 0                |
|                                    | 100-129 | 0                         | NA                       | 0                   | NA                    | 0                 | NA                     | 0                |
|                                    | 130-159 | 1 (7832)                  | 0.63 [0.30-1.33]         | 0.72 [0.51-1.01]    | 0.52 [0.29-0.94]      | 0.60 [0.41-0.88]  | 0.83 [0.57-1.21]       | 0.67 [0.49-0.91] |
|                                    | ≥160    | 1 (1600)                  | 0.54 [0.32-0.90]         | 0.58 [0.36-0.96]    | 0.43 [0.27-0.69]      | 0.50 [0.31-0.81]  | 0.54 [0.25-1.17]       | 0.48 [0.34-0.67] |
| 25-29.9                            | <100    | 5 (86697)                 | 0.97 [0.90-1.04]         | 0.98 [0.93-1.04]    | 0.82 [0.77-0.88]      | 0.86 [0.77-0.95]  | 0.82 [0.76-0.89]       | 0.88 [0.83-0.94] |
|                                    | 100-129 | 7 (58078)                 | 0.84 [0.70-1.00]         | 0.92 [0.83-1.01]    | 0.75 [0.64-0.89]      | 0.78 [0.69-0.87]  | 0.77 [0.66-0.89]       | 0.79 [0.70-0.88] |
|                                    | 130-159 | 10 (70741)                | 0.84 [0.79-0.90]         | 0.93 [0.89-0.98]    | 0.77 [0.69-0.84]      | 0.76 [0.69-0.83]  | 0.84 [0.76-0.92]       | 0.82 [0.78-0.87] |
|                                    | ≥160    | 2 (11039)                 | 0.67 [0.56-0.80]         | 0.74 [0.64-0.86]    | 0.68 [0.60-0.77]      | 0.66 [0.57-0.76]  | 0.75 [0.54-1.03]       | 0.71 [0.64-0.80] |
| ≥30                                | <100    | 1 (16817)                 | 1.20 [0.74-1.95]         | 1.12 [0.79-1.59]    | 1.11 [0.83-1.48]      | 0.82 [0.49-1.37]  | 0.52 [0.30-0.91]       | 0.99 [0.80-1.22] |
|                                    | 100-129 | 1 (2341)                  | 0.58 [0.18-1.89]         | 0.80 [0.32-2.02]    | 0.78 [0.39-1.56]      | 1.95 [1.23-3.09]  | 3.57 [1.10-11.64]      | 1.04 [0.61-1.78] |
|                                    | 130-159 | 1 (10621)                 | 0.82 [0.50-1.35]         | 0.91 [0.63-1.32]    | 0.76 [0.58-1.00]      | 0.95 [0.62-1.46]  | 0.66 [0.40-1.09]       | 0.79 [0.65-0.97] |
|                                    | ≥160    | 0                         | NA                       | 0                   | NA                    | 0                 | NA                     | 0                |
| Absolute Reduction in LDL-C, mg/dL |         |                           |                          |                     |                       |                   |                        |                  |
| <25                                | <35     | 1 (7832)                  | 0.63 [0.30-1.33]         | 0.72 [0.51-1.01]    | 0.52 [0.29-0.94]      | 0.60 [0.41-0.88]  | 0.83 [0.57-1.21]       | 0.67 [0.49-0.91] |
|                                    | 35-65   | 0                         | NA                       |                     |                       |                   |                        |                  |
|                                    | ≥65     | 1 (1600)                  | 0.54 [0.32-0.90]         | 0.58 [0.36-0.96]    | 0.43 [0.27-0.69]      | 0.56 [0.41-0.76]  | 0.54 [0.25-1.17]       | 0.48 [0.34-0.67] |
| 25-29.9                            | <35     | 10 (92270)                | 0.96 [0.91-1.02]         | 0.99 [0.95-1.03]    | 0.86 [0.82-0.90]      | 0.85 [0.79-0.92]  | 0.85 [0.80-0.92]       | 0.89 [0.85-0.93] |
|                                    | 35-65   | 12 (127968)               | 0.80 [0.72-0.88]         | 0.91 [0.86-0.96]    | 0.73 [0.67-0.79]      | 0.74 [0.68-0.80]  | 0.78 [0.71-0.85]       | 0.78 [0.73-0.82] |
|                                    | ≥65     | 2 (6317)                  | 0.70 [0.58-0.84]         | 0.85 [0.59-1.23]    | 0.67 [0.58-0.77]      | 0.65 [0.56-0.76]  | 0.82 [0.48-1.40]       | 0.83 [0.62-1.10] |
| ≥30                                | <35     | 0                         |                          |                     |                       |                   |                        |                  |
|                                    | 35-65   | 2 (27438)                 | 1.00 [0.69-1.45]         | 1.01 [0.79-1.31]    | 0.92 [0.63-1.33]      | 0.89 [0.64-1.24]  | 0.59 [0.41-0.86]       | 0.88 [0.71-1.10] |
|                                    | ≥65     | 1 (2341)                  | 0.58 [0.18-1.89]         | 0.80 [0.32-2.02]    | 0.78 [0.39-1.56]      | 1.95 [1.23-3.09]  | 3.57 [1.10-11.64]      | 1.04 [0.61-1.78] |
| Percentage Reduction in LDL-C      |         |                           |                          |                     |                       |                   |                        |                  |
| <25                                | <25     | 1 (7832)                  | 0.63 [0.30-1.33]         | 0.72 [0.51-1.01]    | 0.52 [0.29-0.94]      | 0.60 [0.41-0.88]  | 0.83 [0.57-1.21]       | 0.67 [0.49-0.91] |
|                                    | 25-50   | 1 (1600)                  | 0.54 [0.32-0.90]         | 0.58 [0.36-0.96]    | 0.43 [0.27-0.69]      | 0.50 [0.31-0.81]  | 0.54 [0.25-1.17]       | 0.48 [0.34-0.67] |
|                                    | >50     | 0                         |                          |                     |                       |                   |                        |                  |
| 25-29.9                            | <25     | 7 (65825)                 | 0.98 [0.92-1.05]         | 0.99 [0.94-1.03]    | 0.86 [0.81-0.91]      | 0.89 [0.82-0.97]  | 0.91 [0.83-0.99]       | 0.93 [0.89-0.97] |
|                                    | 25-50   | 15 (115364)               | 0.83 [0.79-0.88]         | 0.91 [0.85-0.96]    | 0.76 [0.71-0.82]      | 0.76 [0.71-0.81]  | 0.77 [0.73-0.82]       | 0.80 [0.76-0.83] |
|                                    | >50     | 2 (45366)                 | 0.78 [0.49-1.22]         | 0.95 [0.79-1.14]    | 0.63 [0.46-0.85]      | 0.64 [0.46-0.88]  | 0.76 [0.54-1.08]       | 0.78 [0.61-0.99] |
| ≥30                                | <25     | 0                         |                          |                     |                       |                   |                        |                  |
|                                    | 25-50   | 2 (27438)                 | 1.00 [0.69-1.45]         | 1.01 [0.79-1.31]    | 0.92 [0.63-1.33]      | 0.89 [0.64-1.24]  | 0.59 [0.41-0.86]       | 0.88 [0.71-1.10] |
|                                    | >50     | 1 (2341)                  | 0.58 [0.18-1.89]         | 0.80 [0.32-2.02]    | 0.78 [0.39-1.56]      | 1.95 [1.23-3.09]  | 3.57 [1.10-11.64]      | 1.04 [0.61-1.78] |

**e Table 8: Sensitivity analysis stratified for agent used in active treatment group**

|                          |         | STATIN  |          |                  | EZETIMIBE + STATIN |          |                  | PCSK9 INHIBITOR |          |                  |
|--------------------------|---------|---------|----------|------------------|--------------------|----------|------------------|-----------------|----------|------------------|
| OUTCOME                  | BMI     | Studies | Patients | HR [95% CI]      | Studies            | Patients | HR [95% CI]      | Studies         | Patients | HR [95% CI]      |
| Cardiovascular mortality | <25     | 2       | 9432     | 0.57 [0.37-0.86] | 0                  | 0        | NA               | 0               | 0        | NA               |
|                          | 25-29.9 | 19      | 150780   | 0.82 [0.76-0.89] | 3                  | 29287    | 0.96 [0.88-1.05] | 2               | 46488    | 0.96 [0.81-1.14] |
|                          | ≥30     | 0       | 0        | NA               | 0                  | 0        | NA               | 3               | 29779    | 0.96 [0.68-1.33] |
| All-cause mortality      | <25     | 2       | 9432     | 0.67 [0.51-0.89] | 0                  | 0        | NA               | 0               | 0        | NA               |
|                          | 25-29.9 | 19      | 150780   | 0.92 [0.88-0.96] | 3                  | 29287    | 1.01 [0.95-1.07] | 2               | 46488    | 0.94 [0.77-1.15] |
|                          | ≥30     | 0       | 0        | NA               | 0                  | 0        | NA               | 3               | 29779    | 1.00 [0.78-1.12] |
| Myocardial infarction    | <25     | 2       | 9432     | 0.47 [0.32-0.67] | 0                  | 0        | NA               | 0               | 0        | NA               |
|                          | 25-29.9 | 19      | 150780   | 0.76 [0.71-0.81] | 3                  | 29287    | 0.88 [0.81-0.95] | 2               | 46488    | 0.79 [0.68-0.93] |
|                          | ≥30     | 0       | 0        | NA               | 0                  | 0        | NA               | 3               | 29779    | 0.89 [0.67-1.19] |
| Revascularisation        | <25     | 2       | 9432     | 0.56 [0.41-0.76] | 0                  | 0        | NA               | 0               | 0        | NA               |
|                          | 25-29.9 | 19      | 150780   | 0.76 [0.72-0.82] | 3                  | 29287    | 0.86 [0.71-1.05] | 2               | 46488    | 0.83 [0.73-0.93] |
|                          | ≥30     | 0       | 0        | NA               | 0                  | 0        | NA               | 3               | 29779    | 1.15 [0.69-1.94] |
| Cerebrovascular events   | <25     | 2       | 9432     | 0.76 [0.54-1.07] | 0                  | 0        | NA               | 0               | 0        | NA               |
|                          | 25-29.9 | 19      | 150780   | 0.81 [0.75-0.87] | 3                  | 29287    | 0.86 [0.77-0.97] | 2               | 46488    | 0.77 [0.66-0.89] |
|                          | ≥30     | 0       | 0        | NA               | 0                  | 0        | NA               | 3               | 29779    | 0.89 [0.40-2.00] |
| MACE                     | <25     | 2       | 9432     | 0.57 [0.41-0.79] | 0                  | 0        | NA               | 0               | 0        | NA               |
|                          | 25-29.9 | 19      | 150780   | 0.80 [0.75-0.84] | 3                  | 29287    | 0.92 [0.86-0.97] | 2               | 46488    | 0.85 [0.80-0.90] |
|                          | ≥30     | 0       | 0        | NA               | 0                  | 0        | NA               | 3               | 29779    | 0.89 [0.75-1.06] |

**e Table 9: Sensitivity analysis stratified according to primary prevention trials versus secondary prevention trials**

| OUTCOME                  | BMI (Kg/m <sup>2</sup> ) | PRIMARY PREVENTION |          |                  | *SECONDARY PREVENTION |          |                  |
|--------------------------|--------------------------|--------------------|----------|------------------|-----------------------|----------|------------------|
|                          |                          | Studies            | Patients | HR [95% CI]      | Studies               | Patients | HR [95% CI]      |
| Cardiovascular mortality | <25                      | 1                  | 7832     | 0.63 [0.30-1.33] | 1                     | 1600     | 0.54 [0.32-0.90] |
|                          | 25-29.9                  | 12                 | 88667    | 0.81 [0.72-0.91] | 12                    | 137888   | 0.89 [0.82-0.96] |
|                          | ≥30                      | 0                  | 0        | NA               | 3                     | 29779    | 0.96 [0.68-1.33] |
| All-cause mortality      | <25                      | 1                  | 7832     | 0.72 [0.51-1.01] | 1                     | 1600     | 0.58 [0.36-0.96] |
|                          | 25-29.9                  | 12                 | 88667    | 0.95 [0.90-1.01] | 12                    | 137888   | 0.93 [0.88-0.99] |
|                          | ≥30                      | 0                  | 0        | NA               | 3                     | 29779    | 1.00 [0.78-1.28] |
| Myocardial infarction    | <25                      | 1                  | 7832     | 0.52 [0.29-0.94] | 1                     | 1600     | 0.43 [0.32-0.67] |
|                          | 25-29.9                  | 12                 | 88667    | 0.74 [0.66-0.83] | 12                    | 137888   | 0.79 [0.74-0.84] |
|                          | ≥30                      | 0                  | 0        | NA               | 3                     | 29779    | 0.89 [0.67-1.19] |
| Revascularisation        | <25                      | 1                  | 7832     | 0.60 [0.41-0.88] | 1                     | 1600     | 0.50 [0.31-0.81] |
|                          | 25-29.9                  | 12                 | 88667    | 0.75 [0.67-0.83] | 12                    | 137888   | 0.80 [0.74-0.87] |
|                          | ≥30                      | 0                  | 0        | NA               | 3                     | 29779    | 1.15 [0.69-1.94] |
| Cerebrovascular events   | <25                      | 1                  | 7832     | 0.83 [0.57-1.21] | 1                     | 1600     | 0.54 [0.25-1.17] |
|                          | 25-29.9                  | 12                 | 88667    | 0.84 [0.74-0.94] | 12                    | 137888   | 0.80 [0.75-0.84] |
|                          | ≥30                      | 0                  | 0        | NA               | 3                     | 29779    | 0.89 [0.40-2.00] |
| MACE                     | <25                      | 1                  | 7832     | 0.67 [0.49-0.91] | 1                     | 1600     | 0.48 [0.34-0.67] |
|                          | 25-29.9                  | 12                 | 88667    | 0.79 [0.72-0.86] | 12                    | 137888   | 0.84 [0.80-0.89] |
|                          | ≥30                      | 0                  | 0        | NA               | 3                     | 29779    | 0.89 [0.75-1.06] |

\*Secondary prevention trials were defined as having patients with history of known atherosclerotic cardiovascular disease (coronary artery disease or cerebrovascular disease or peripheral artery disease) or at least 60% secondary prevention population.

**e Table 10: Analysis stratified according to weighted mean values for LDL-C parameters, mg/dL**

| BMI (Kg/m <sup>2</sup> ) | Trials                          | Baseline LDL-C, mg/dL | Absolute LDL-C reduction, mg/dL | Percentage reduction in LDL-C | HAZARD RATIO [95% CI]    |                         |                         |                         |                         |                         |
|--------------------------|---------------------------------|-----------------------|---------------------------------|-------------------------------|--------------------------|-------------------------|-------------------------|-------------------------|-------------------------|-------------------------|
|                          |                                 |                       |                                 |                               | Cardiovascular mortality | All-cause mortality     | Myocardial infarction   | Revascularisation       | Cerebrovascular events  | MACE                    |
| <25                      | GREACE <sup>6</sup>             | 179.5                 | 72.9                            | 40.6                          | 0.54 [0.32-0.90]         | 0.58 [0.36-0.96]        | 0.43 [0.27-0.69]        | 0.50 [0.31-0.81]        | 0.54 [0.25-1.17]        | 0.48 [0.34-0.67]        |
|                          | MEGA <sup>15</sup>              | 156.6                 | 20.4                            | 13.0                          | 0.63 [0.30-1.33]         | 0.72 [[0.51-1.01]       | 0.52 [0.29-0.94]        | 0.60 [0.41-0.88]        | 0.83 [0.57-1.21]        | 0.67 [0.49-0.91]        |
|                          |                                 | <b>168.0</b>          | <b>46.6</b>                     | <b>26.8</b>                   | <b>0.57 [0.37-0.86]</b>  | <b>0.67 [0.51-0.89]</b> | <b>0.47 [0.32-0.67]</b> | <b>0.56 [0.41-0.76]</b> | <b>0.76 [0.54-1.07]</b> | <b>0.57 [0.41-0.79]</b> |
| 25-29.9                  | 4S <sup>28</sup>                | 188.3                 | 67.6                            | 35.9                          | 0.66 [0.53-0.82]         | 0.71 [0.59-0.86]        | 0.67 [0.58-0.78]        | 0.66 [0.57-0.77]        | 0.65 [0.47-0.89]        | 0.72 [0.63-0.82]        |
|                          | WOSCOPS <sup>1</sup>            | 192                   | 49.9                            | 26                            | 0.69 [0.48-0.98]         | 0.79 [0.61-1.01]        | 0.70 [0.57-0.87]        | 0.64 [0.46-0.90]        | 0.90 [0.61-1.34]        | 0.70 [0.58-0.85]        |
|                          | CARE <sup>2</sup>               | 139                   | 40.3                            | 29                            | 0.81 [0.62-1.05]         | 0.92 [0.75-1.12]        | 0.76 [0.62-0.93]        | 0.75 [0.65-0.88]        | 0.70 [0.49-0.98]        | 0.77 [0.65-0.93]        |
|                          | AFCAPS/TextCAPS <sup>3</sup>    | 150                   | 41.7                            | 27.8                          | 0.68 [0.37-1.25]         | 1.04 [0.76-1.42]        | 0.61 [0.44-0.83]        | 0.68 [0.53-0.88]        | 0.82 [0.41-1.67]        | 0.64 [0.51-0.80]        |
|                          | GISSI-P <sup>4</sup>            | 151.6                 | 17.9                            | 11.8                          | 0.80 [0.56-1.15]         | 0.82 [0.60-1.12]        | 0.88 [0.59-1.32]        | 0.90 [0.72-1.11]        | 1.05 [0.56-1.97]        | 0.88 [0.69-1.13]        |
|                          | ALLHAT-LLT <sup>5</sup>         | 145.5                 | 17.4                            | 12                            | 0.98 [0.84-1.15]         | 0.98 [0.88-1.10]        | 0.90 [0.79-1.04]        | 0.88 [0.76-1.03]        | 0.90 [0.75-1.09]        | 0.90 [0.79-1.04]        |
|                          | HPS <sup>7</sup>                | 131.5                 | 38.7                            | 29.4                          | 0.83 [0.76-0.92]         | 0.88 [0.82-0.95]        | 0.74 [0.68-0.81]        | 0.78 [0.72-0.85]        | 0.76 [0.67-0.86]        | 0.79 [0.74-0.83]        |
|                          | PROSPER <sup>8</sup>            | 147                   | 50                              | 34                            | 0.76 [0.58-0.99]         | 0.97 [0.83-1.14]        | 0.86 [0.72-1.03]        | 0.82 [0.54-1.25]        | 0.98 [0.76-1.26]        | 0.85 [0.74-0.97]        |
|                          | ALERT <sup>9</sup>              | 158.5                 | 38.1                            | 24                            | 0.67 [0.44-1.01]         | 1.04 [0.82-1.31]        | 0.70 [0.48-1.01]        | 0.89 [0.61-1.28]        | 1.17 [0.84-1.64]        | 0.84 [0.65-1.07]        |
|                          | ASCOT-LLA <sup>10</sup>         | 133                   | 37.2                            | 28                            | 0.90 [0.66-1.23]         | 0.87 [0.71-1.06]        | 0.82 [0.40-1.67]        | 0.63 [0.45-0.89]        | 0.73 [0.56-0.96]        | 0.79 [0.69-0.90]        |
|                          | CARDS <sup>12</sup>             | 117                   | 46.4                            | 39.7                          | 0.68 [0.41-1.12]         | 0.73 [0.52-1.02]        | 0.55 [0.37-0.83]        | 0.69 [0.41-1.16]        | 0.52 [0.31-0.88]        | 0.63 [0.48-0.83]        |
|                          | PROVE IT-TIMI22 <sup>11</sup>   | 106                   | 32.9                            | 31                            | 0.79 [0.46-1.37]         | 0.70 [0.48-1.01]        | 0.91 [0.72-1.14]        | 0.88 [0.76-1.02]        | 1.00 [0.55-1.83]        | 0.87 [0.77-0.98]        |
|                          | IDEAL <sup>13</sup>             | 121.4                 | 21.7                            | 17.9                          | 1.03 [0.85-1.24]         | 0.98 [0.85-1.13]        | 0.83 [0.71-0.98]        | 0.77 [0.69-0.86]        | 0.87 [0.70-1.08]        | 0.89 [0.78-1.01]        |
|                          | TNT <sup>14</sup>               | 97.5                  | 24                              | 24.6                          | 0.80 [0.62-1.04]         | 1.01 [0.85-1.20]        | 0.78 [0.66-0.93]        | 0.74 [0.67-0.82]        | 0.77 [0.64-0.93]        | 0.78 [0.69-0.89]        |
|                          | ASPEN <sup>16</sup>             | 113.5                 | 33.8                            | 29.8                          | 1.03 [0.65-1.61]         | 1.03 [0.74-1.44]        | 0.74 [0.52-1.07]        | 0.98 [0.73-1.31]        | 0.89 [0.56-1.42]        | 0.92-0.75-1.14          |
|                          | SPARCL <sup>17</sup>            | 132.7                 | 55.3                            | 41.7                          | 0.78 [0.58-1.05]         | 1.00 [0.82-1.21]        | 0.51 [0.35-0.74]        | 0.55 [0.43-0.71]        | 0.77 [0.67-0.88]        | 0.80 [0.69-0.92]        |
|                          | JUPITER <sup>18</sup>           | 108                   | 54.9                            | 50.8                          | 0.53 [0.40-0.70]         | 0.80 [0.66-0.96]        | 0.46 [0.30-0.70]        | 0.54 [0.41-0.72]        | 0.52 [0.34-0.79]        | 0.56 [0.46-0.69]        |
|                          | SEARCH <sup>19</sup>            | 96.7                  | 13.5                            | 14                            | 0.99 [0.88-1.11]         | 0.99 [0.91-1.09]        | 0.85 [0.76-0.95]        | 0.93 [0.83-1.05]        | 0.91 [0.77-1.08]        | 0.95 [0.89-1.02]        |
|                          | HOPE-3 <sup>20</sup>            | 127.8                 | 34.4                            | 26.9                          | 0.89 [0.72-1.11]         | 0.93 [0.80-1.08]        | 0.65 [0.44-0.95]        | 0.68 [0.48-0.96]        | 0.70 [0.52-0.95]        | 0.76 [0.64-0.91]        |
|                          | FOURIER <sup>26</sup>           | 92                    | 54.1                            | 58.8                          | 1.05 [0.88-1.25]         | 1.04 [0.91-1.19]        | 0.73 [0.65-0.82]        | 0.78 [0.71-0.86]        | 0.79 [0.66-0.95]        | 0.85 [0.79-0.92]        |
|                          | ODYSSEY OUTCOMES <sup>27</sup>  | 92                    | 38.7                            | 42.1                          | 0.88 [0.74-1.05]         | 0.85 [0.73-0.98]        | 0.86 [0.77-0.96]        | 0.88 [0.79-0.98]        | 0.73 [0.57-0.93]        | 0.85 [0.78-0.93]        |
|                          | SEAS <sup>21</sup>              | 139.5                 | 69                              | 49.5                          | 0.83 [0.56-1.23]         | 1.04 [0.79-1.36]        | 0.64 [0.35-1.17]        | 0.46 [0.20-1.06]        | 1.12 [0.68-1.85]        | 0.96 [0.83-1.12]        |
|                          | SHARP <sup>22</sup>             | 107.3                 | 29.3                            | 27.3                          | 0.93 [0.81-1.07]         | 1.02 [0.94-1.11]        | 0.93 [0.77-1.12]        | 0.81 [0.69-0.94]        | 0.83 [0.68-1.02]        | 0.85 [0.76-0.95]        |
|                          | IMPROVE IT <sup>23</sup>        | 93.8                  | 12.8                            | 13.7                          | 1.00 [0.89-1.13]         | 0.99 [0.91-1.07]        | 0.87 [0.80-0.95]        | 0.96 [0.90-1.02]        | 0.86 [0.73-1.01]        | 0.93 [0.87-0.99]        |
|                          |                                 | <b>128.4</b>          | <b>38.3</b>                     | <b>30.2</b>                   | <b>0.86 [0.80-0.92]</b>  | <b>0.94 [0.90-0.98]</b> | <b>0.78 [0.74-0.82]</b> | <b>0.78 [0.74-0.83]</b> | <b>0.81 [0.77-0.86]</b> | <b>0.82 [0.78-0.86]</b> |
| ≥30                      | ODYSSEY LONG TERM <sup>24</sup> | 122.3                 | 70.8                            | 57.9                          | 0.58 [0.18-1.89]         | 0.80 [0.32-2.02]        | 0.78 [0.39-1.56]        | 1.95 [1.23-3.09]        | 3.57 [1.10-11.64]       | 1.04 [0.61-1.78]        |
|                          | SPIRE 1 <sup>25</sup>           | 93.8                  | 44.9                            | 47.9                          | 1.20 [0.74-1.95]         | 1.12 [0.79-1.59]        | 1.11 [0.83-1.48]        | 0.82 [0.49-1.37]        | 0.52 [0.30-0.91]        | 0.99 [0.80-1.22]        |
|                          | SPIRE 2 <sup>25</sup>           | 133.6                 | 58                              | 43.4                          | 0.82 [0.50-1.35]         | 0.91 [0.63-1.32]        | 0.76 [0.58-1.00]        | 0.95 [0.62-1.46]        | 0.66 [0.40-1.09]        | 0.79 [0.65-0.97]        |
|                          |                                 | <b>116.5</b>          | <b>57.9</b>                     | <b>49.7</b>                   | <b>0.96 [0.68-1.33]</b>  | <b>1.00 [0.78-1.28]</b> | <b>0.89 [0.67-1.19]</b> | <b>1.15 [0.69-1.94]</b> | <b>0.89 [0.40-2.00]</b> | <b>0.89 [0.75-1.06]</b> |
|                          | Total                           | <b>129.9</b>          | <b>40.9</b>                     | <b>32.0</b>                   | <b>0.85 [0.80-0.91]</b>  | <b>0.93 [0.90-0.97]</b> | <b>0.77 [0.73-0.82]</b> | <b>0.78 [0.73-0.83]</b> | <b>0.81 [0.77-0.86]</b> | <b>0.82 [0.79-0.86]</b> |

Bold indicates weighted mean values

e Table 11. Sensitivity analysis by excluding individual trials

| BMI (Kg/m <sup>2</sup> ) | Trials Excluded                 | HAZARD RATIO [95% CI]    |                     |                       |                   |                        |                  |
|--------------------------|---------------------------------|--------------------------|---------------------|-----------------------|-------------------|------------------------|------------------|
|                          |                                 | Cardiovascular mortality | All-cause mortality | Myocardial infarction | Revascularisation | Cerebrovascular events | MACE             |
| <25                      | GREACE <sup>6</sup>             | 0.63 [0.30-1.33]         | 0.72 [0.51-1.01]    | 0.52 [0.29-0.94]      | 0.60 [0.41-0.88]  | 0.83 [0.57-1.21]       | 0.67 [0.49-0.91] |
|                          | MEGA <sup>15</sup>              | 0.54 [0.32-0.90]         | 0.58 [0.36-0.96]    | 0.43 [0.27-0.69]      | 0.50 [0.31-0.81]  | 0.54 [0.25-1.17]       | 0.48 [0.34-0.67] |
| 25-29.9                  | 4S <sup>28</sup>                | 0.87 [0.82-0.93]         | 0.95 [0.92-0.99]    | 0.79 [0.74-0.83]      | 0.79 [0.74-0.84]  | 0.82 [0.77-0.86]       | 0.83 [0.79-0.86] |
|                          | WOSCOPS <sup>1</sup>            | 0.86 [0.81-0.92]         | 0.94 [0.90-0.98]    | 0.78 [0.74-0.83]      | 0.79 [0.74-0.84]  | 0.81 [0.77-0.86]       | 0.83 [0.79-0.86] |
|                          | CARE <sup>2</sup>               | 0.86 [0.80-0.92]         | 0.94 [0.90-0.98]    | 0.78 [0.73-0.83]      | 0.78 [0.74-0.84]  | 0.82 [0.77-0.86]       | 0.82 [0.78-0.86] |
|                          | AFCAPS/TextCAPS <sup>3</sup>    | 0.86 [0.80-0.92]         | 0.94 [0.90-0.98]    | 0.78 [0.74-0.83]      | 0.79 [0.74-0.84]  | 0.81 [0.77-0.86]       | 0.83 [0.79-0.86] |
|                          | GISSI-P <sup>4</sup>            | 0.86 [0.80-0.92]         | 0.94 [0.90-0.98]    | 0.78 [0.73-0.82]      | 0.78 [0.73-0.83]  | 0.81 [0.77-0.86]       | 0.82 [0.78-0.86] |
|                          | ALLHAT-LLT <sup>5</sup>         | 0.85 [0.79-0.91]         | 0.93 [0.89-0.98]    | 0.77 [0.73-0.82]      | 0.78 [0.73-0.83]  | 0.81 [0.76-0.85]       | 0.82 [0.78-0.86] |
|                          | HPS <sup>7</sup>                | 0.86 [0.80-0.92]         | 0.94 [0.91-0.99]    | 0.78 [0.74-0.83]      | 0.78 [0.73-0.84]  | 0.82 [0.77-0.87]       | 0.82 [0.78-0.86] |
|                          | PROSPER <sup>8</sup>            | 0.86 [0.81-0.92]         | 0.94 [0.90-0.98]    | 0.77 [0.73-0.82]      | 0.78 [0.73-0.83]  | 0.81 [0.76-0.85]       | 0.82 [0.78-0.86] |
|                          | ALERT <sup>9</sup>              | 0.86 [0.81-0.92]         | 0.94 [0.90-0.98]    | 0.78 [0.74-0.83]      | 0.78 [0.73-0.83]  | 0.80 [0.77-0.85]       | 0.82 [0.78-0.86] |
|                          | ASCOT-LLA <sup>10</sup>         | 0.86 [0.80-0.92]         | 0.94 [0.90-0.98]    | 0.77 [0.73-0.82]      | 0.79 [0.74-0.84]  | 0.82 [0.77-0.86]       | 0.82 [0.78-0.86] |
|                          | CARDS <sup>12</sup>             | 0.86 [0.81-0.92]         | 0.94 [0.90-0.98]    | 0.78 [0.74-0.83]      | 0.78 [0.74-0.84]  | 0.82 [0.77-0.86]       | 0.83 [0.79-0.86] |
|                          | PROVE IT-TIMI22 <sup>11</sup>   | 0.86 [0.80-0.92]         | 0.94 [0.90-0.98]    | 0.77 [0.73-0.82]      | 0.78 [0.73-0.83]  | 0.81 [0.77-0.86]       | 0.82 [0.78-0.86] |
|                          | IDEAL <sup>13</sup>             | 0.85 [0.79-0.91]         | 0.93 [0.90-0.98]    | 0.77 [0.73-0.82]      | 0.78 [0.73-0.84]  | 0.81 [0.76-0.86]       | 0.82 [0.78-0.86] |
|                          | TNT <sup>14</sup>               | 0.86 [0.80-0.92]         | 0.93 [0.90-0.98]    | 0.78 [0.73-0.82]      | 0.79 [0.74-0.84]  | 0.82 [0.77-0.87]       | 0.82 [0.78-0.86] |
|                          | ASPEN <sup>16</sup>             | 0.85 [0.80-0.91]         | 0.94 [0.90-0.98]    | 0.77 [0.74-0.82]      | 0.78 [0.73-0.83]  | 0.81 [0.77-0.86]       | 0.82 [0.78-0.86] |
|                          | SPARCL <sup>17</sup>            | 0.86 [0.80-0.92]         | 0.94 [0.90-0.98]    | 0.79 [0.75-0.83]      | 0.79 [0.75-0.84]  | 0.82 [0.77-0.87]       | 0.82 [0.78-0.86] |
|                          | JUPITER <sup>18</sup>           | 0.88 [0.83-0.93]         | 0.94 [0.91-0.98]    | 0.79 [0.75-0.83]      | 0.79 [0.75-0.84]  | 0.82 [0.78-0.86]       | 0.83 [0.80-0.87] |
|                          | SEARCH <sup>19</sup>            | 0.85 [0.79-0.91]         | 0.93 [0.89-0.97]    | 0.77 [0.73-0.82]      | 0.77 [0.73-0.83]  | 0.80 [0.76-0.85]       | 0.81 [0.78-0.85] |
|                          | HOPE-3 <sup>20</sup>            | 0.85 [0.80-0.92]         | 0.94 [0.90-0.98]    | 0.78 [0.74-0.83]      | 0.79 [0.74-0.84]  | 0.82 [0.77-0.86]       | 0.82 [0.79-0.86] |
|                          | FOURIER <sup>26</sup>           | 0.85 [0.79-0.91]         | 0.93 [0.89-0.97]    | 0.78 [0.74-0.83]      | 0.78 [0.73-0.84]  | 0.81 [0.77-0.86]       | 0.82 [0.78-0.86] |
|                          | ODYSSEY OUTCOMES <sup>27</sup>  | 0.85 [0.80-0.92]         | 0.94 [0.90-0.98]    | 0.77 [0.73-0.82]      | 0.78 [0.73-0.83]  | 0.82 [0.77-0.86]       | 0.82 [0.78-0.86] |
|                          | SEAS <sup>21</sup>              | 0.86 [0.80-0.92]         | 0.94 [0.90-0.98]    | 0.78 [0.74-0.83]      | 0.79 [0.74-0.84]  | 0.81 [0.77-0.86]       | 0.82 [0.78-0.85] |
|                          | SHARP <sup>22</sup>             | 0.85 [0.79-0.91]         | 0.93 [0.89-0.97]    | 0.77 [0.73-0.82]      | 0.78 [0.73-0.83]  | 0.81 [0.76-0.86]       | 0.82 [0.78-0.86] |
|                          | IMPROVE IT <sup>23</sup>        | 0.85 [0.79-0.91]         | 0.93 [0.89-0.97]    | 0.77 [0.73-0.82]      | 0.78 [0.73-0.82]  | 0.81 [0.77-0.86]       | 0.81 [0.78-0.85] |
| ≥30                      | ODYSSEY LONG TERM <sup>24</sup> | 1.00 [0.69-1.45]         | 1.01 [0.79-1.31]    | 0.92 [0.63-1.33]      | 0.89 [0.64-1.24]  | 0.59 [0.41-0.86]       | 0.88 [0.71-1.10] |
|                          | SPIRE 1 <sup>25</sup>           | 0.78 [0.49-1.23]         | 0.89 [0.63-1.26]    | 0.76 [0.59-0.98]      | 1.35 [0.67-2.73]  | 1.41 [0.27-7.28]       | 0.82 [0.68-0.99] |
|                          | SPIRE 2 <sup>25</sup>           | 1.03 [0.57-1.84]         | 1.07 [0.77-1.49]    | 1.05 [0.81-1.38]      | 1.27 [0.55-2.97]  | 1.27 [0.19-8.32]       | 1.00 [0.82-1.21] |

**e Table 12. Baseline Characteristics of the Trials and Participants**

| Study (Year)                       | N     | Age  | No. (%)   |            |                  |           |              | CKD (%)                 | Interventions |            |      |      | BMI (Kg/m <sup>2</sup> ) | Baseline LDL-C (mg/dL) | Between-Group Difference Achieved LDL-C (mg/dL) | Follow-up, Yrs |
|------------------------------------|-------|------|-----------|------------|------------------|-----------|--------------|-------------------------|---------------|------------|------|------|--------------------------|------------------------|-------------------------------------------------|----------------|
|                                    |       |      | Women     | CAD        | Vascular Disease | Diabetes  | Active Agent |                         | No.           | Control    | No.  |      |                          |                        |                                                 |                |
| <b>STATIN</b>                      |       |      |           |            |                  |           |              |                         |               |            |      |      |                          |                        |                                                 |                |
| 4S (1994) <sup>28</sup>            | 4444  | 58.6 | 827 (19)  | 4444 (100) | 4444 (100)       | 202 (5)   | 505 (11)     | Simvastatin (20-40mg)   | 2221          | Placebo    | 2223 | 26.0 | 188.3                    | 67.6                   | 5.4                                             |                |
| WOSCOPS (1995) <sup>1</sup>        | 6595  | 55   | 0         | 338 (5)    | 531 (8)          | 76 (1)    | NA           | Pravastatin (40 mg)     | 3302          | Placebo    | 3293 | 25.9 | 192                      | 49.9                   | 4.9                                             |                |
| CARE (1996) <sup>2</sup>           | 4159  | 59   | 576 (14)  | 4159 (100) | 4159 (100)       | 586 (14)  | NA           | Pravastatin (40 mg)     | 2081          | Placebo    | 2078 | 28.0 | 139                      | 40.3                   | 5.0                                             |                |
| AFCAPS/TexCAPS (1998) <sup>3</sup> | 6605  | 58.2 | 997 (15)  | <1         | <1               | 155 (2)   | 304 (5)      | Lovastatin (20-40 mg)   | 3304          | Placebo    | 3301 | 26.7 | 150                      | 41.7                   | 5.2                                             |                |
| GISSI-P (2000) <sup>4</sup>        | 4271  | 59.9 | 587 (14)  | 4271 (100) | 4271 (100)       | 582 (14)  | NA           | Pravastatin (20 mg)     | 2138          | Usual care | 2133 | 26.3 | 151.6                    | 17.9                   | 2.0                                             |                |
| ALLHAT-LLT (2002) <sup>5</sup>     | 10355 | 66   | 5051 (49) | 1475 (14)  | NA               | 3638 (35) | NA           | Pravastatin (20 mg)     | 5170          | Usual care | 5185 | 29.0 | 145.5                    | 17.4                   | 4.8                                             |                |
| GREACE (2002) <sup>6</sup>         | 1600  | 58.5 | 344 (22)  | 1600 (100) | 1600 (100)       | 313 (20)  | NA           | Atorvastatin (10-80 mg) | 800           | Usual care | 800  | 24.0 | 179.5                    | 72.9                   | 3.0                                             |                |



|                                          |       |      |              |                |                |               |              |                           |       |                        |       |      |       |      |     |
|------------------------------------------|-------|------|--------------|----------------|----------------|---------------|--------------|---------------------------|-------|------------------------|-------|------|-------|------|-----|
| HPS (2002) <sup>7</sup>                  | 20536 | 63.4 | 5082<br>(25) | 13386<br>(65)  | 17907<br>(87)  | 5963<br>(29)  | 1329<br>(6)  | Simvastatin<br>(40mg)     | 10269 | Placebo                | 10267 | 27.2 | 131.5 | 38.7 | 5   |
| PROSPER (2002) <sup>8</sup>              | 5804  | 75   | 3000<br>(52) | 2335<br>(40)   | 2565<br>(44)   | 623 (11)      | 3077<br>(53) | Pravastatin<br>(40 mg)    | 2891  | Placebo                | 2913  | 26.5 | 147   | 50   | 3.2 |
| ALERT (2003) <sup>9</sup>                | 2102  | 49.8 | 715<br>(34)  | 148<br>(7)     | 158 (8)        | 396 (19)      | NA           | Fluvastatin<br>(40 mg)    | 1050  | Placebo                | 1052  | 25.8 | 158.5 | 38.1 | 5.4 |
| ASCOT-LLA<br>(2003) <sup>10</sup>        | 10305 | 63.0 | 1942<br>(19) | <1             | 1515<br>(15)   | 2527<br>(25)  | 6517<br>(63) | Atorvastatin<br>(10 mg)   | 5168  | Placebo                | 5137  | 28.6 | 133   | 37.2 | 3.3 |
| PROVE IT-TIMI<br>22 (2004) <sup>11</sup> | 4162  | 58.2 | 911<br>(22)  | 4162<br>(100)  | 4162<br>(100)  | 734<br>(18)   | NA           | Atorvastatin<br>(80 mg)   | 2099  | Pravastatin<br>(40mg)  | 2063  | 29.0 | 106   | 32.9 | 2.0 |
| CARDS (2004) <sup>12</sup>               | 2841  | 61.6 | 909<br>(32)  | <1             | <1             | 2838<br>(100) | 970<br>(34)  | Atorvastatin<br>(10 mg)   | 1429  | Placebo                | 1412  | 29.3 | 117   | 46.4 | 3.9 |
| IDEAL (2005) <sup>13</sup>               | 8888  | 61.7 | 1702<br>(19) | 8888<br>(100)  | 8888<br>(100)  | 1069<br>(12)  | NA           | Atorvastatin<br>(80mg)    | 4439  | Simvastatin<br>(20mg)  | 4449  | 27.3 | 121.4 | 21.7 | 4.8 |
| TNT (2005) <sup>14</sup>                 | 10001 | 61.0 | 1902<br>(19) | 10001<br>(100) | 10001<br>(100) | 1501<br>(15)  | NA           | Atorvastatin<br>(80mg)    | 4995  | Atorvastatin<br>(10mg) | 5006  | 28.0 | 97.5  | 24   | 4.9 |
| MEGA (2006) <sup>15</sup>                | 8214  | 58.3 | 5547<br>(68) | <1             | <1             | 1686<br>(21)  | 2978<br>(38) | Pravastatin<br>(10-20 mg) | 3866  | Usual care             | 3966  | 23.8 | 156.6 | 20.4 | 5.3 |
| ASPEN (2006) <sup>16</sup>               | 2410  | 61.0 | 811<br>(34)  | 790<br>(33)    | 1121<br>(47)   | 2410<br>(100) | NA           | Atorvastatin<br>(10 mg)   | 1211  | Placebo                | 1199  | 28.8 | 113.5 | 33.8 | 4.0 |
| SPARCL (2006) <sup>17</sup>              | 4731  | 62.7 | 1908<br>(40) | 0              | 4731<br>(100)  | 794 (17)      | NA           | Atorvastatin<br>(80mg)    | 2365  | Placebo                | 2366  | 27.4 | 132.7 | 55.3 | 4.9 |
| JUPITER (2008) <sup>18</sup>             | 17802 | 66.0 | 6801<br>(30) | 0              | 0              | 76 (<1)       | 3267<br>(18) | Rosuvastatin<br>(20 mg)   | 8901  | Placebo                | 8901  | 28.3 | 108   | 54.9 | 1.9 |

|                                             |       |      |              |                |                |               |               |                                                      |       |                       |       |      |       |      |     |
|---------------------------------------------|-------|------|--------------|----------------|----------------|---------------|---------------|------------------------------------------------------|-------|-----------------------|-------|------|-------|------|-----|
| SEARCH (2010) <sup>19</sup>                 | 12064 | 64.2 | 2052<br>(17) | 12064<br>(100) | 12064<br>(100) | 1267<br>(11)  | 1686<br>(14)  | Simvastatin<br>(80mg)                                | 6031  | Simvastatin<br>(20mg) | 6033  | 28.0 | 96.7  | 13.5 | 6.7 |
| HOPE 3 (2016) <sup>20</sup>                 | 12705 | 65.7 | 5874<br>(46) | 0              | 0              | 731 (6)       | NA            | Rosuvastatin<br>(10 mg)                              | 6361  | Placebo               | 6344  | 27.1 | 127.8 | 34.4 | 5.6 |
| <b>EZETIMIBE + STATIN</b>                   |       |      |              |                |                |               |               |                                                      |       |                       |       |      |       |      |     |
| SEAS (2008) <sup>21</sup>                   | 1873  | 67.5 | 723<br>(39)  | 0              | 0              | 0             | NA            | Simvastatin<br>(40 mg)<br><br>+ ezetimibe<br>(10 mg) | 944   | Placebo               | 929   | 26.8 | 139.5 | 69   | 4.4 |
| SHARP (2011) <sup>22</sup>                  | 9270  | 62.0 | 3470<br>(37) | 0              | 1393<br>(15)   | 2094<br>(23)  | 9270<br>(100) | Simvastatin<br>(20 mg)<br><br>+ ezetimibe<br>(10 mg) | 4650  | Placebo               | 4620  | 27.1 | 107.3 | 29.3 | 4.9 |
| IMPROVE IT<br>(2015) <sup>23</sup>          | 18144 | 63.6 | 4416<br>(24) | 18144<br>(100) | 18144<br>(100) | 4933<br>(27)  | NA            | Simvastatin<br>(40mg) +<br>Ezetimibe<br>(10mg)       | 9067  | Simvastatin<br>(40mg) | 9077  | 28.3 | 93.8  | 12.8 | 6.0 |
| <b>PCSK9 INHIBITOR</b>                      |       |      |              |                |                |               |               |                                                      |       |                       |       |      |       |      |     |
| ODYSSEY<br>LONGTERM<br>(2015) <sup>24</sup> | 2341  | 60.5 | 884<br>(38)  | 1607<br>(69)   | 2341<br>(100)  | 809 (35)      | NA            | Alirocumab<br>(150mg<br>every 2<br>weeks)            | 1553  | Placebo               | 788   | 30.4 | 122.3 | 70.8 | 1.5 |
| FOURIER (2017) <sup>26</sup>                | 27564 | 62.5 | 6769<br>(25) | 22351<br>(81)  | 27564<br>(100) | 10081<br>(37) | NA            | Evolocumab<br>(140mg<br>every 2<br>weeks or          | 13784 | Placebo               | 13780 | 28.6 | 92    | 54.1 | 2.2 |

|                                       |        |      |           |             |            |           |    |                                      |      |         |      |      |       |      |     |
|---------------------------------------|--------|------|-----------|-------------|------------|-----------|----|--------------------------------------|------|---------|------|------|-------|------|-----|
|                                       |        |      |           |             |            |           |    | 420mg every month)                   |      |         |      |      |       |      |     |
| SPIRE 1 (2017) <sup>25</sup>          | 16817  | 63.3 | 4439 (26) | NA          | 14563 (87) | 8047 (48) | NA | Bococizumab (150 mg every 2 weeks)   | 8408 | Placebo | 8409 | 30.1 | 93.8  | 44.9 | 0.6 |
| SPIRE 2 (2017) <sup>25</sup>          | 10621  | 62.4 | 3675 (35) | NA          | 8635 (81)  | 4986 (47) | NA | Bococizumab (150mg every 2 weeks)    | 5312 | Placebo | 5309 | 30.4 | 133.6 | 58   | 1.0 |
| ODYSSEY OUTCOMES (2018) <sup>27</sup> | 18,924 | 58.5 | 4762 (25) | 18924 (100) | 759 (4)    | 5444 (29) | NA | Alirocumab (75-150 mg every 2 weeks) | 9462 | Placebo | 9462 | 28.5 | 92    | 38.7 | 2.8 |

Values are mean or median, which ever was available; 4S (SSSS), Scandinavian Simvastatin Survival Study; ALLHAT-LLT, AFCAPS-TexCAPS, Air Force/Texas Coronary Atherosclerosis Prevention Study; ALERT, Assessment of LEscol in Renal Transplantation Study; ASCOT-LLA, Anglo-Scandinavian Cardiac Outcomes Trial–Lipid Lowering Arm; ASPEN, Atorvastatin Study for Prevention of Coronary Heart Disease Endpoints in Non-Insulin-Dependent Diabetes Mellitus; CARE, Cholesterol And Recurrent Events; CARDS, Collaborative Atorvastatin Diabetes Study; FOURIER, Further Cardiovascular Outcomes Research with PCSK9 Inhibition in Subjects with Elevated Risk; GISSI-P, Gruppo Italiano per lo Studio della Sopravvivenza nell’Infarto Miocardico; HOPE-3, Heart Outcomes Prevention Evaluation; GREACE, The GREek Atorvastatin and Coronary-heart-disease Evaluation Study; HPS, Heart Protection Study; IDEAL, Incremental Decrease in End Points Through Aggressive Lipid Lowering Study Group; IMPROVE-IT, Improved Reduction of Outcomes: Vytorin Efficacy International Trial; JUPITER, Justification for the Use of Statins in Prevention: an Intervention Trial Evaluating Rosuvastatin study group; LIPID, Long–term Intervention with Pravastatin in Ischaemic Disease; MEGA, Management of Elevated Cholesterol in the Primary Prevention Group of Adult Japanese Study Group; ODYSSEY LONG TERM, Long-term Safety and Tolerability of Alirocumab in High Cardiovascular Risk Patients with Hypercholesterolemia Not Adequately Controlled with Their Lipid Modifying Therapy; ODYSSEY Outcomes, Evaluation of Cardiovascular Outcomes After an Acute Coronary Syndrome During Treatment With Alirocumab; ; PROVE IT-TIMI 22, the Pravastatin or Atorvastatin Evaluation and Infection Therapy; PROSPER, SEARCH, Study of the Effectiveness of Additional Reductions in Cholesterol and Homocysteine; SEAS, Simvastatin and Ezetimibe in Aortic Stenosis; SHARP, Study of Heart and Renal Protection; SPARCL, The Stroke Prevention by Aggressive Reduction in Cholesterol Levels; SPIRE 1 & 2, Studies of PCSK9 Inhibition and the Reduction of Vascular Events 1 & 2; TNT, Treating to New Targets; WOSCOPS, West of Scotland Coronary Prevention Study

e Figure 1: Meta-Regression for BMI Effect on MACE

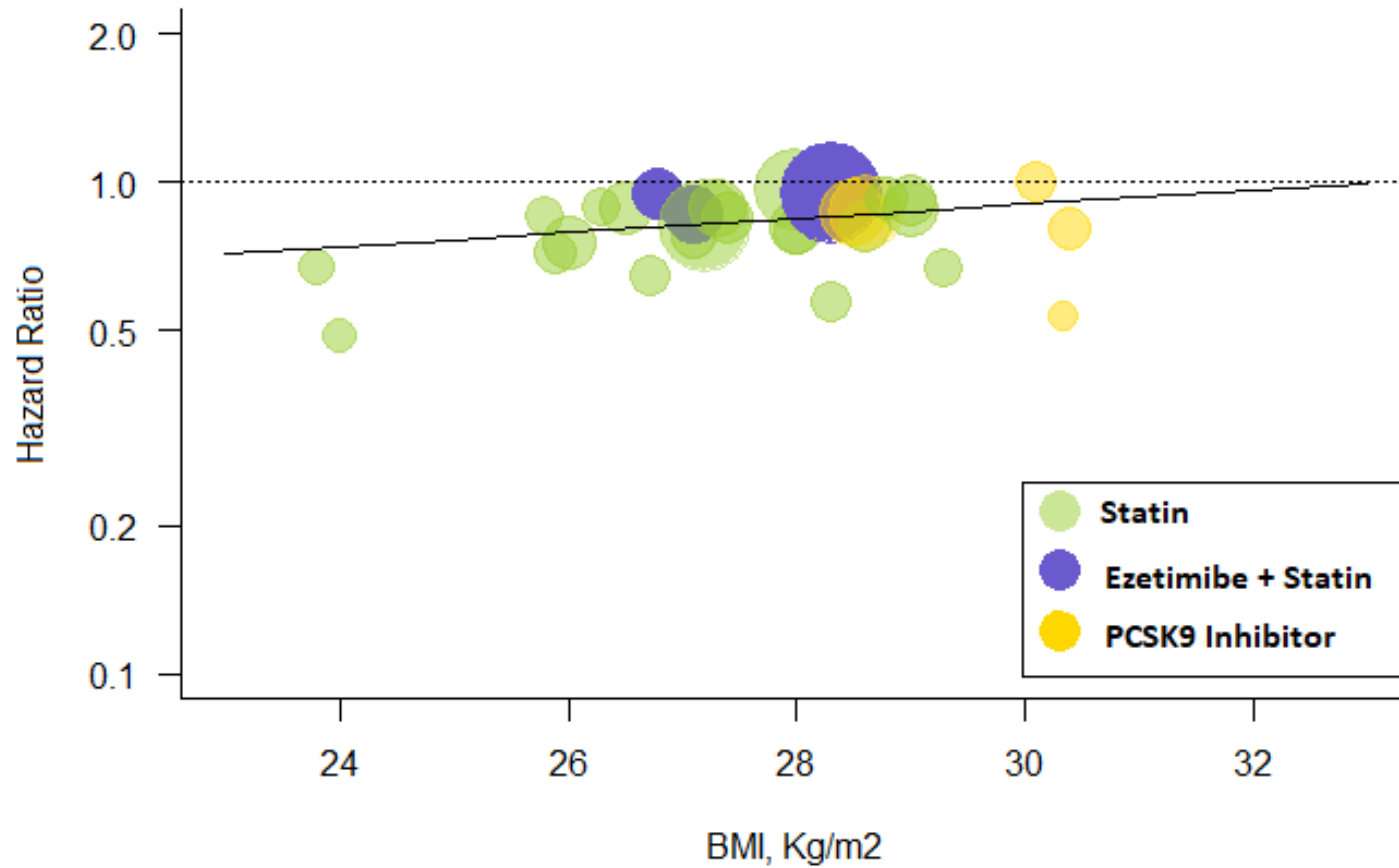

Change in hazard ratios and 95% confidence intervals for MACE plotted against body mass index (BMI, Kg/m<sup>2</sup>). Size of the data marker is proportional to the weight in the meta-regression. Data marker colors represent the classes of lipid-lowering agents used in the active treatment group as per trial randomization design. The solid line represents the meta-regression slope of the change in hazard ratio for treatment across BMI values.

e Figure 2: Meta-Analysis for MACE

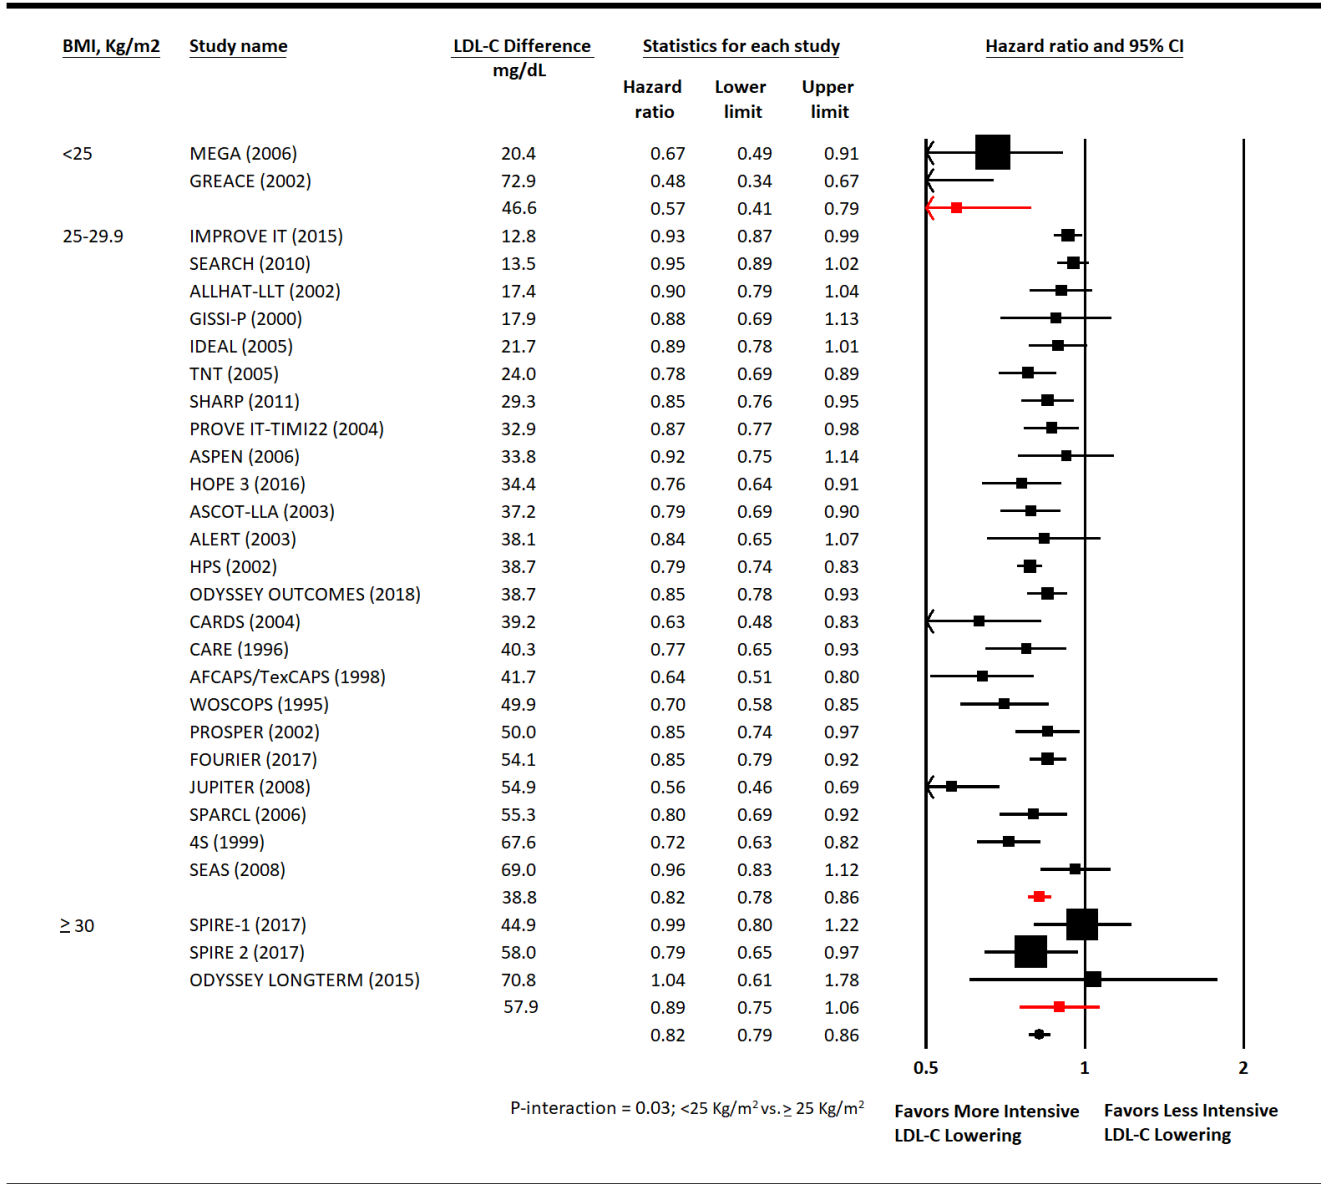

e Figure 3. Meta-Regression for BMI Effect on Myocardial Infarction

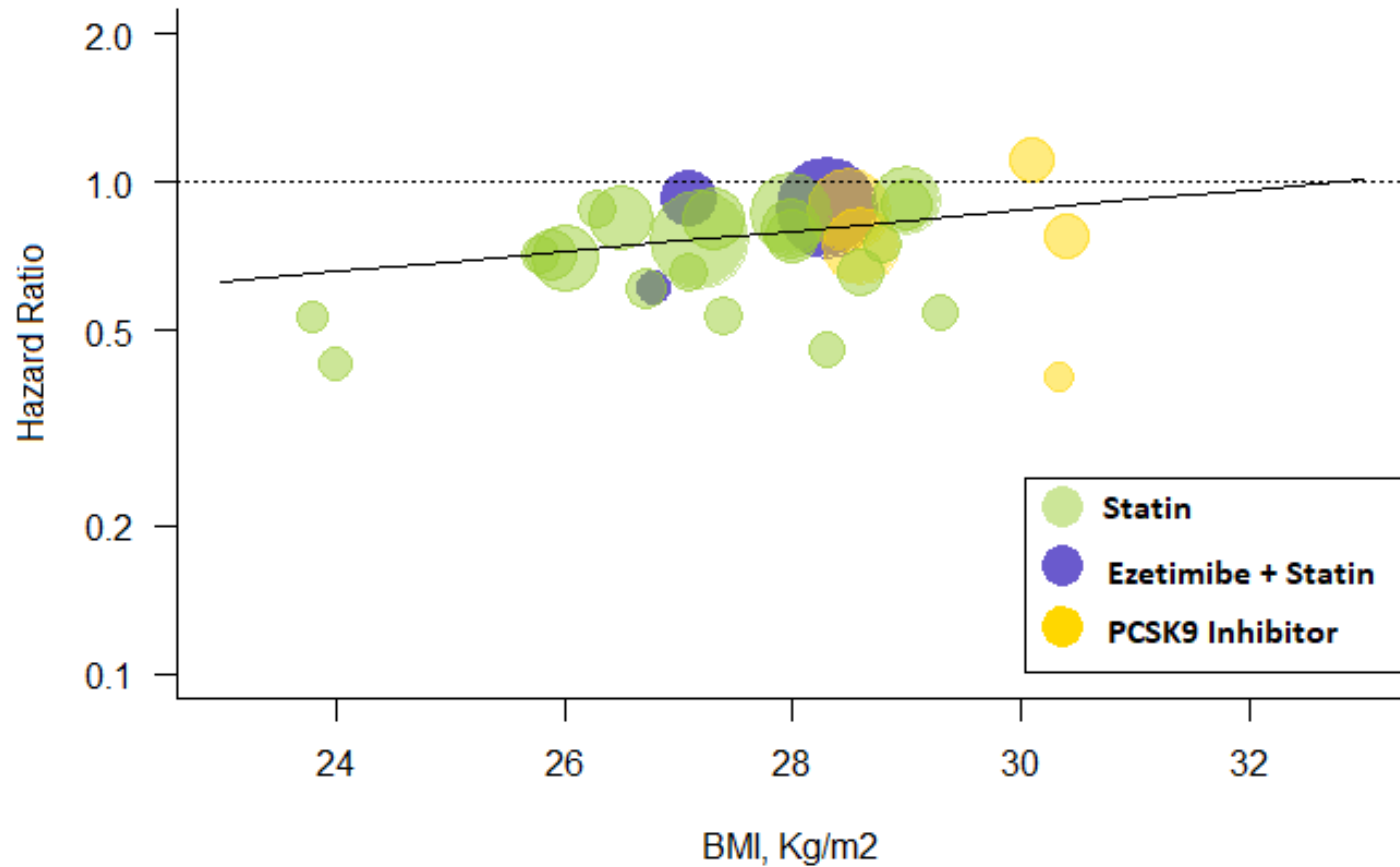

Change in hazard ratios and 95% confidence intervals for myocardial infarction plotted against body mass index (BMI, Kg/m<sup>2</sup>). Size of the data marker is proportional to the weight in the meta-regression. Data marker colors represent the classes of lipid-lowering agents used in the active treatment group as per trial randomization design. The solid line represents the meta-regression slope of the change in hazard ratio for treatment across BMI values.



e Figure 5. Meta-Regression for BMI Effect on Revascularization

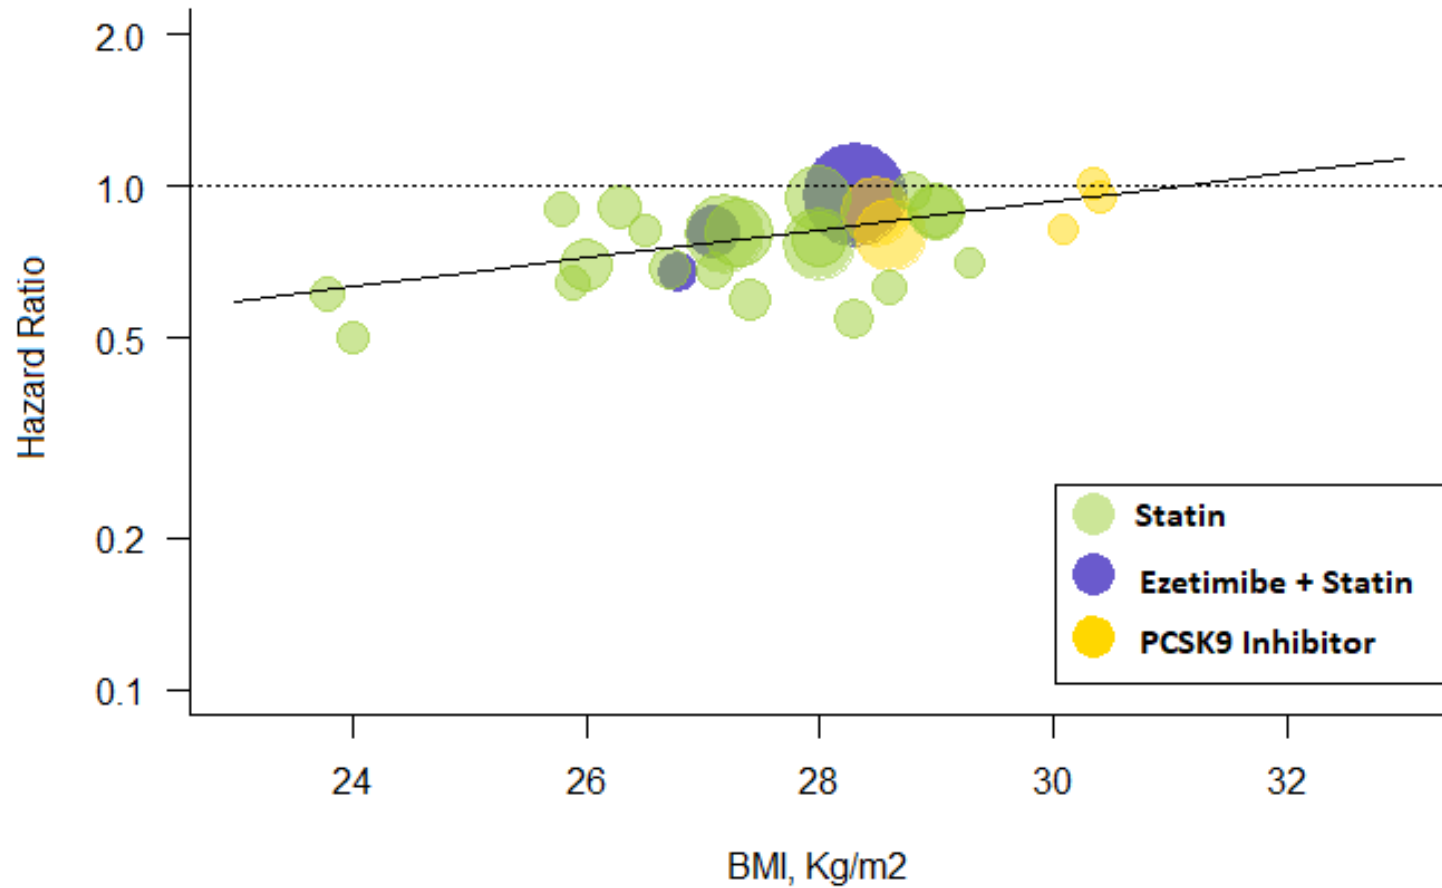

Change in hazard ratios and 95% confidence intervals for revascularization plotted against body mass index (BMI, Kg/m<sup>2</sup>). Size of the data marker is proportional to the weight in the meta-regression. Data marker colors represent the classes of lipid-lowering agents used in the active treatment group as per trial randomization design. The solid line represents the meta-regression slope of the change in hazard ratio for treatment across BMI values.



e Figure 6. Meta-Analysis for Revascularization

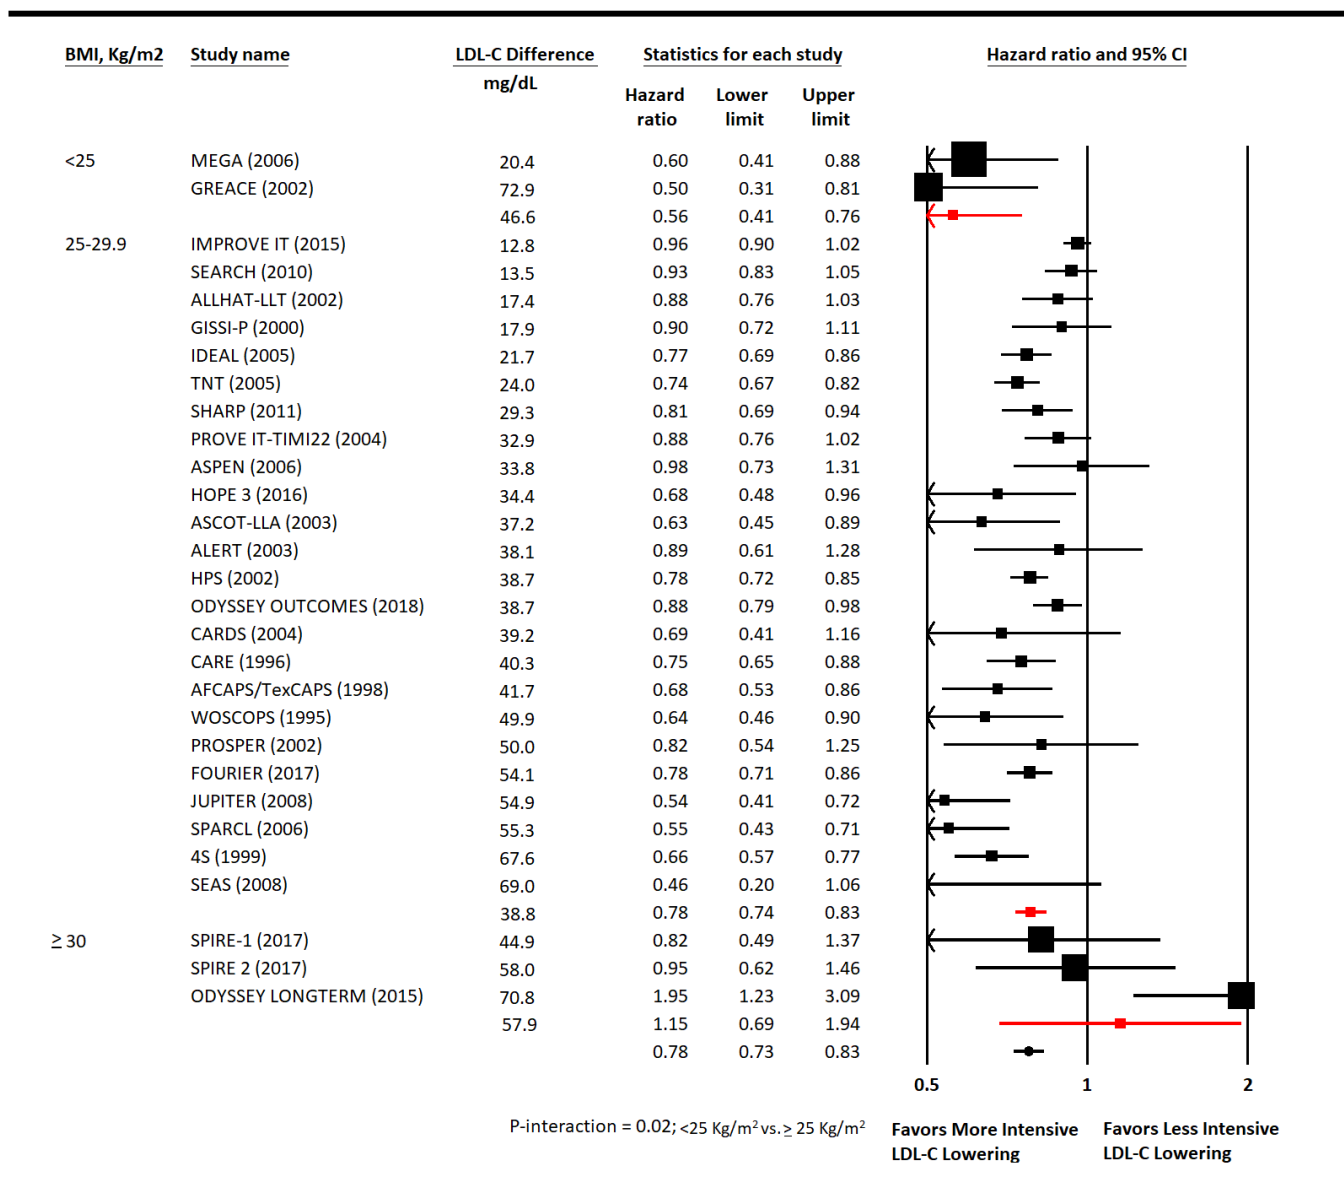

e Figure 7. Meta-Regression for BMI Effect on Cerebrovascular Events

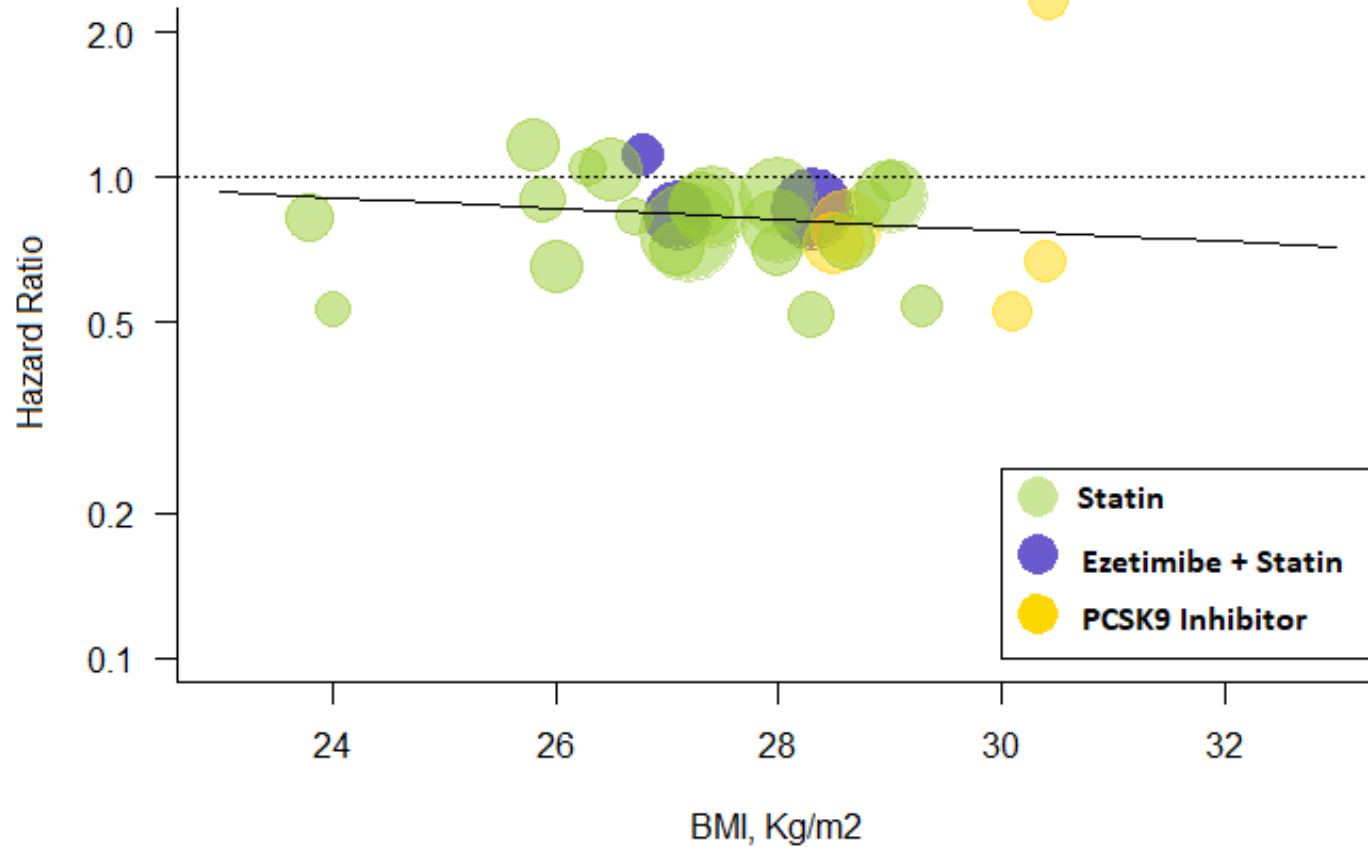

Change in hazard ratios and 95% confidence intervals for cerebrovascular events plotted against body mass index (BMI, Kg/m<sup>2</sup>). Size of the data marker is proportional to the weight in the meta-regression. Data marker colors represent the classes of lipid-lowering agents used in the active treatment group as per trial randomization design. The solid line represents the meta-regression slope of the change in hazard ratio for treatment across BMI values.

e Figure 8. Meta-Analysis for Cerebrovascular Events

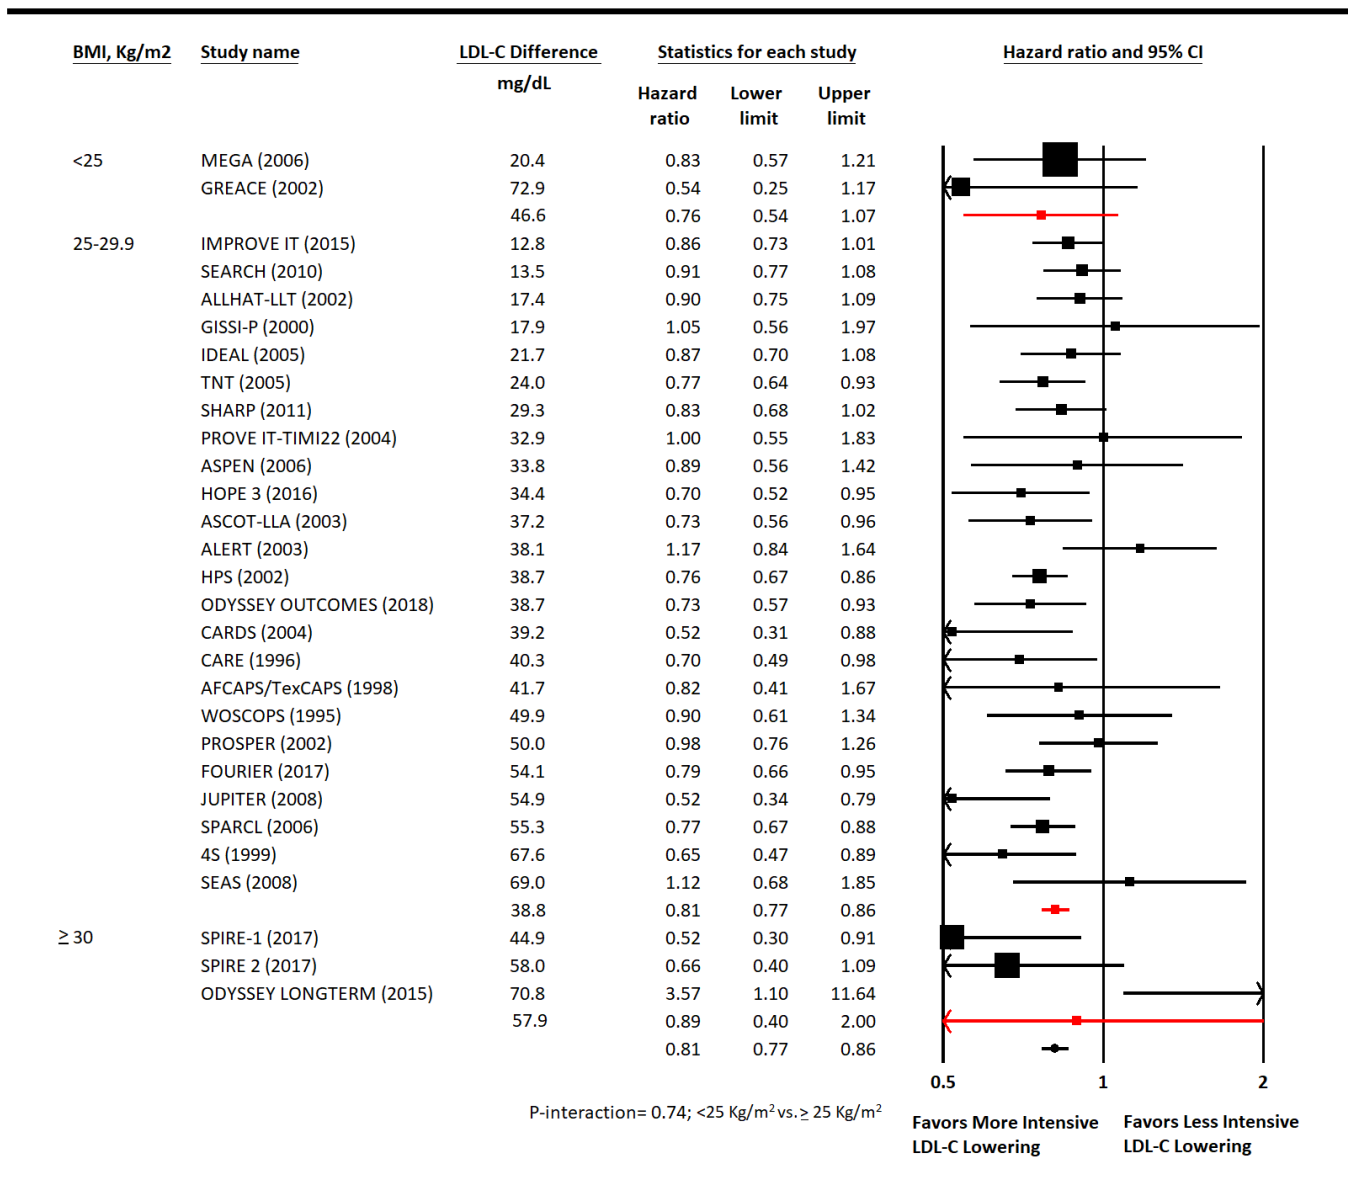

e Figure 9. Funnel plot for assessment of publication bias: cardiovascular mortality

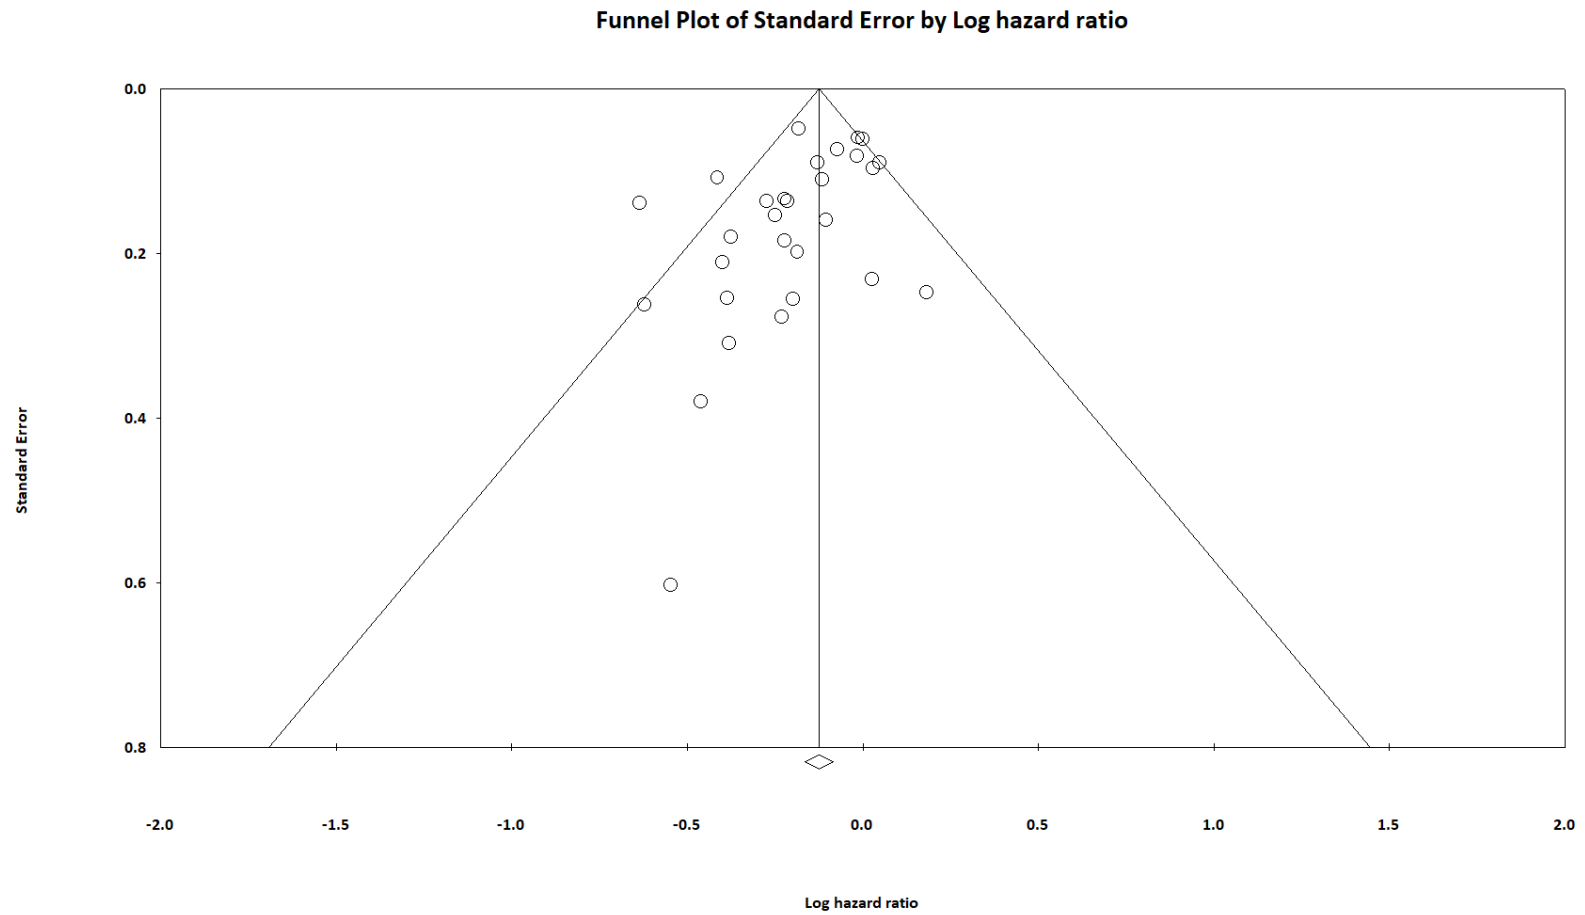

e Figure 10. Funnel plot for assessment of publication bias: all- cause mortality

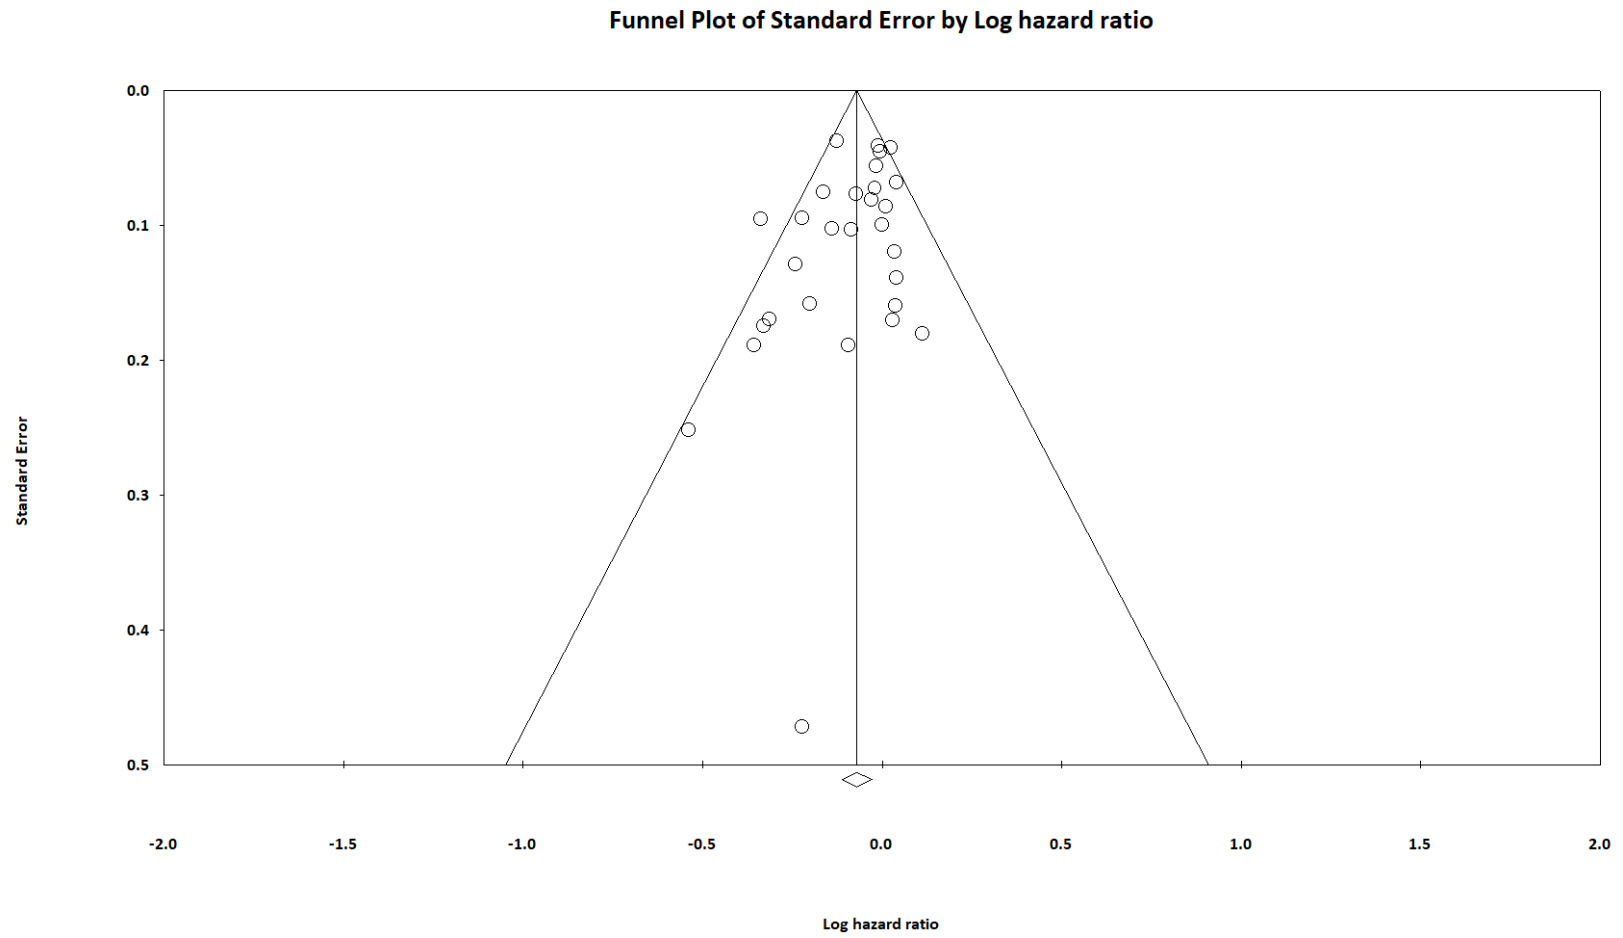

e Figure 11. Funnel plot for assessment of publication bias: myocardial infarction

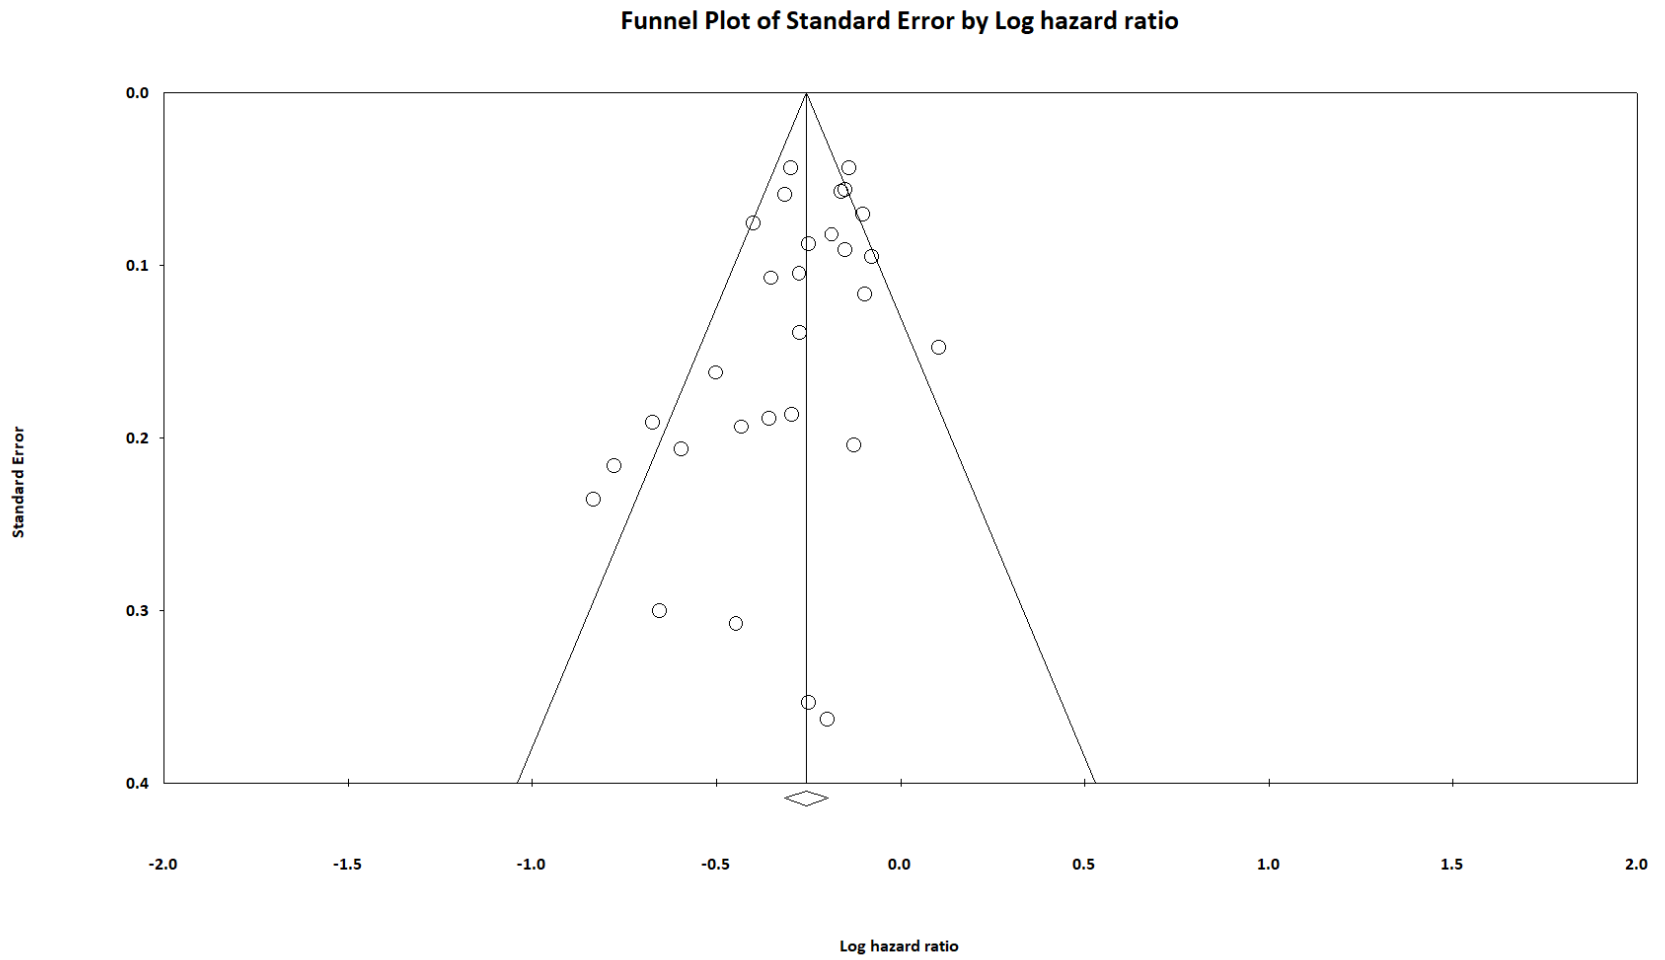

e Figure 12. Funnel plot for assessment of publication bias: revascularization

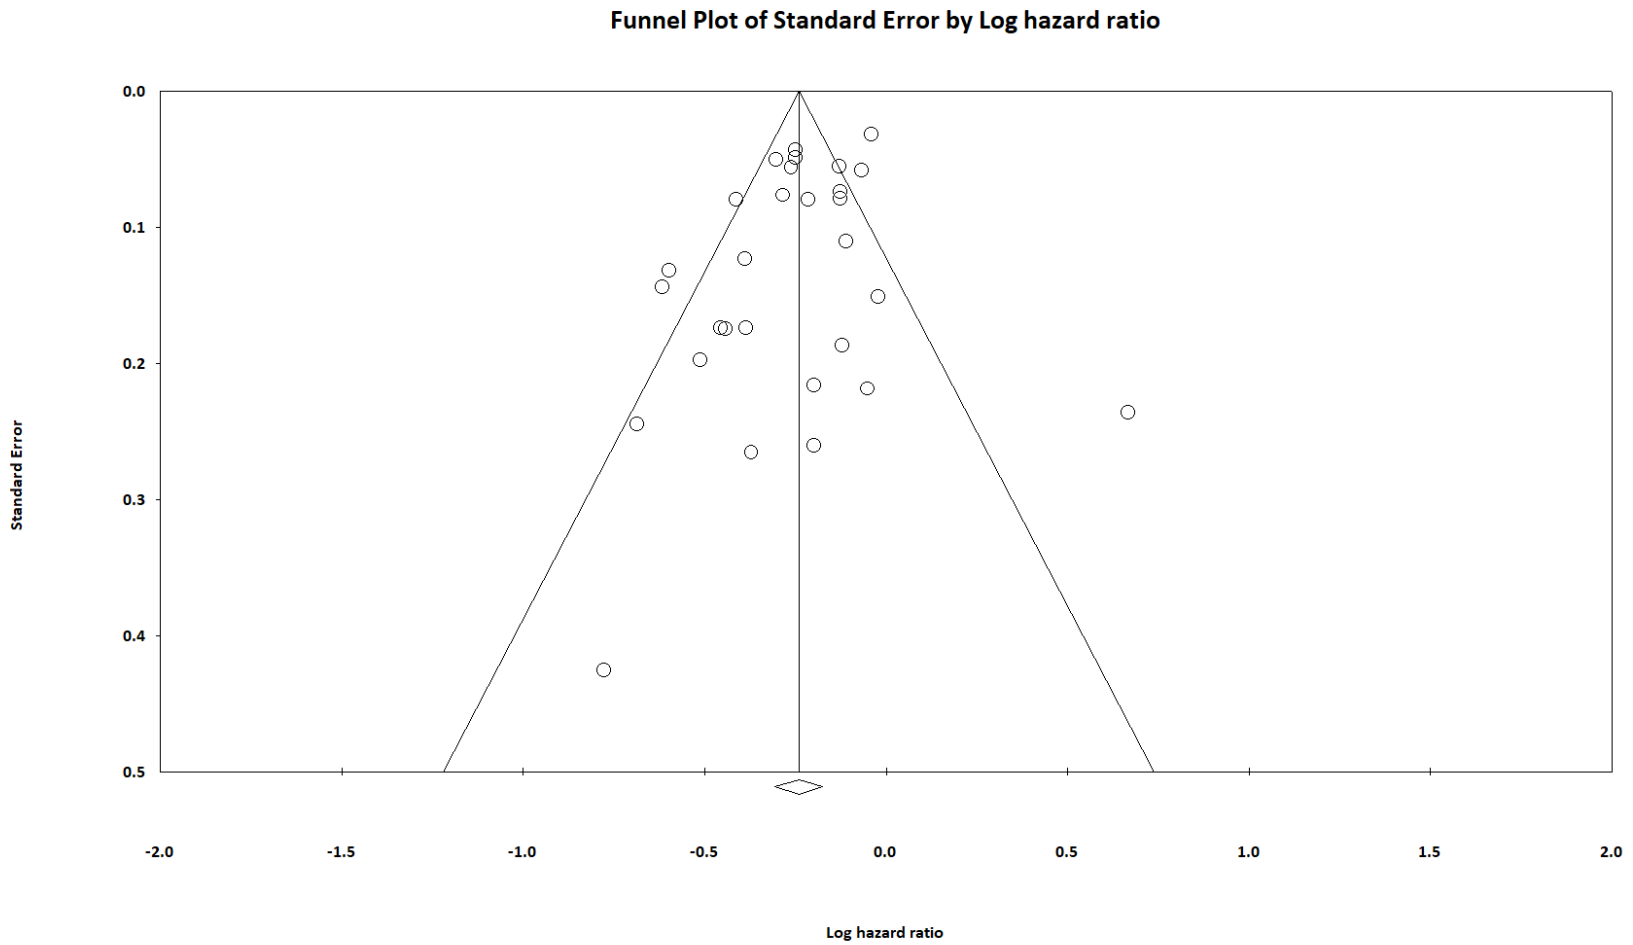

e Figure 13. Funnel plot for assessment of publication bias: cerebrovascular events

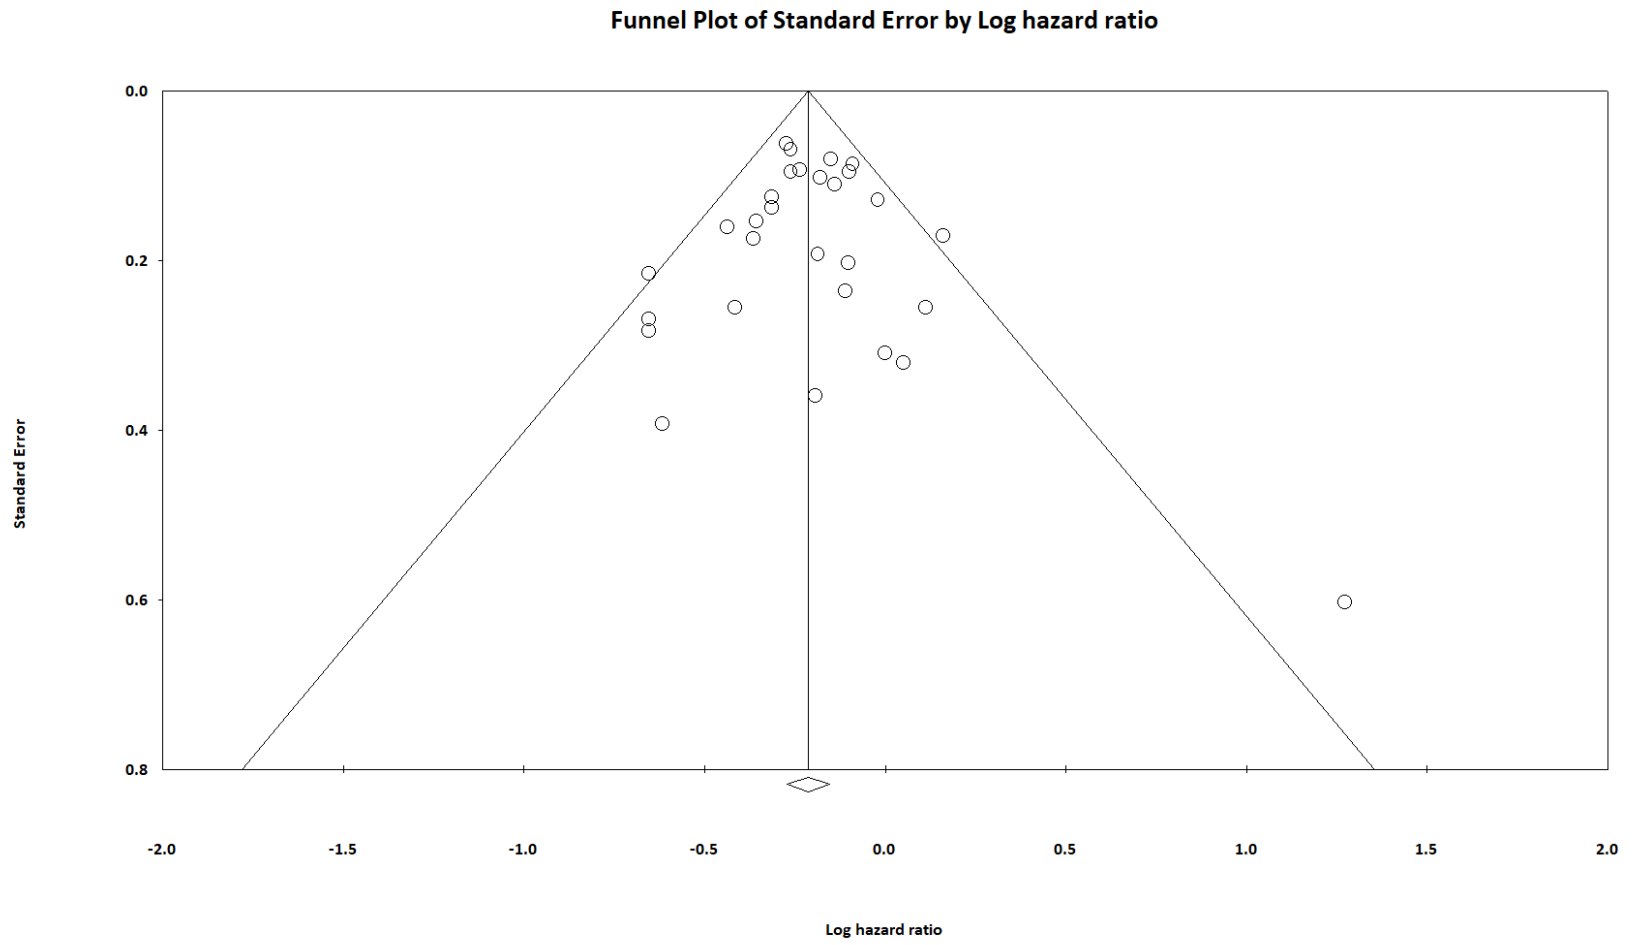



e Figure 14. Funnel plot for assessment of publication bias: major adverse cardiovascular events

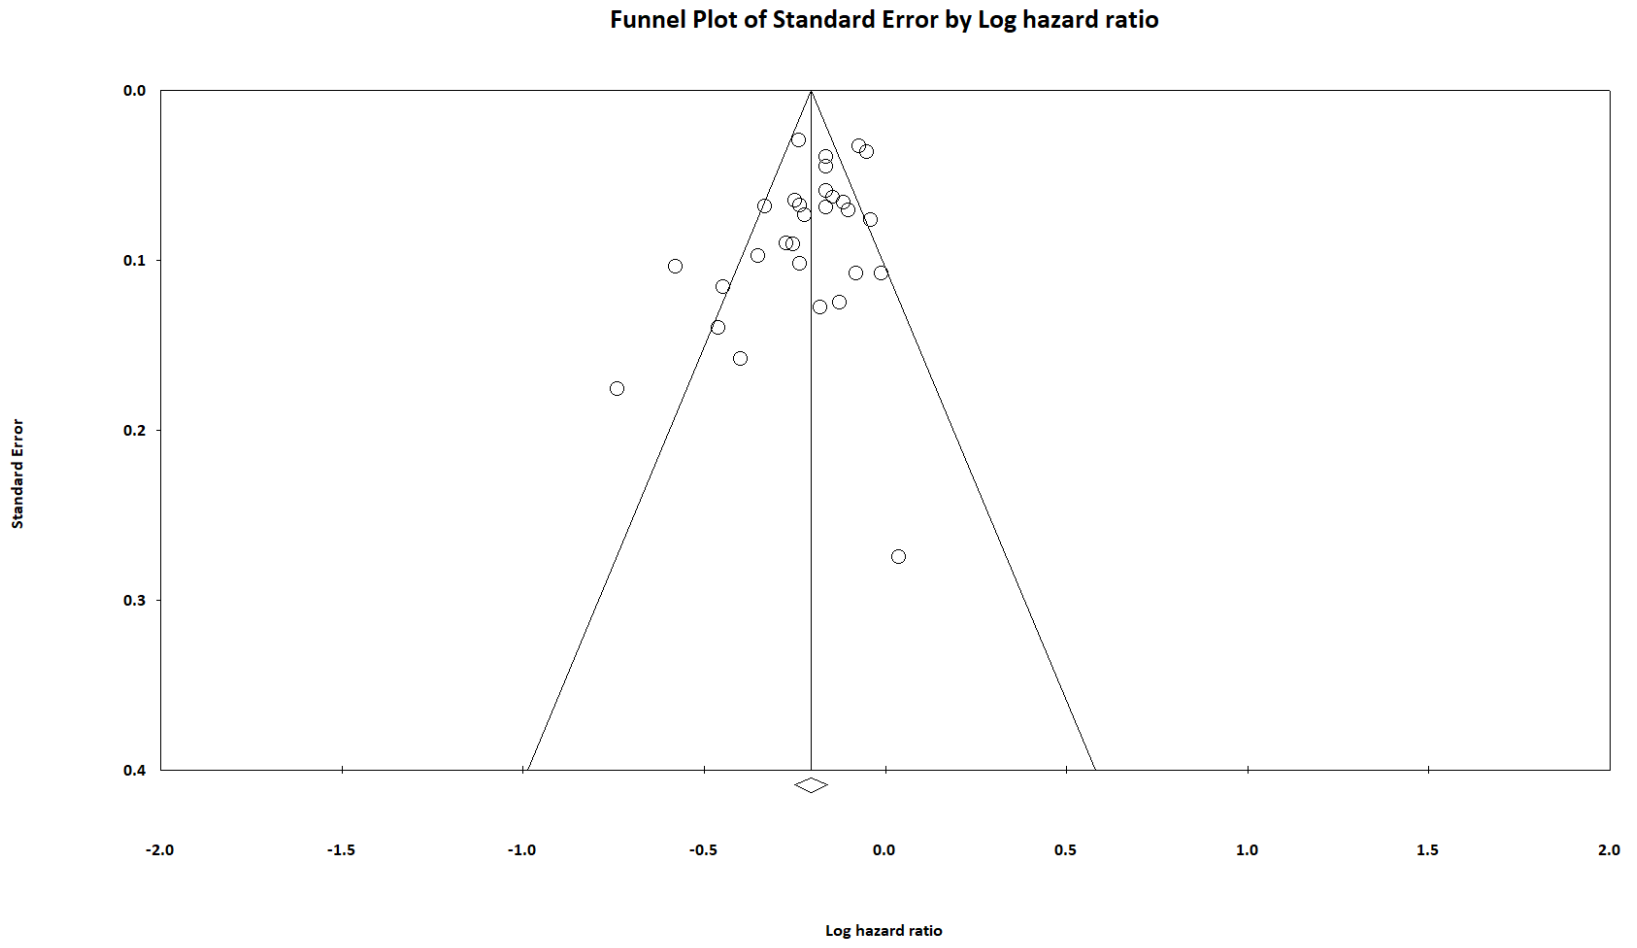

## REFERENCES

1. Shepherd J, Cobbe SM, Ford I, Isles CG, Lorimer AR, MacFarlane PW, McKillop JH and Packard CJ. Prevention of coronary heart disease with pravastatin in men with hypercholesterolemia. West of Scotland Coronary Prevention Study Group. *N Engl J Med*. 1995;333:1301-7.
2. Sacks FM, Pfeffer MA, Moye LA, Rouleau JL, Rutherford JD, Cole TG, Brown L, Warnica JW, Arnold JM, Wun CC, Davis BR and Braunwald E. The effect of pravastatin on coronary events after myocardial infarction in patients with average cholesterol levels. Cholesterol and Recurrent Events Trial investigators. *N Engl J Med*. 1996;335:1001-9.
3. Downs JR, Clearfield M, Weis S, Whitney E, Shapiro DR, Beere PA, Langendorfer A, Stein EA, Kruyer W and Gotto AM, Jr. Primary prevention of acute coronary events with lovastatin in men and women with average cholesterol levels: results of AFCAPS/TexCAPS. Air Force/Texas Coronary Atherosclerosis Prevention Study. *Jama*. 1998;279:1615-22.
4. Results of the low-dose (20 mg) pravastatin GISSI Prevenzione trial in 4271 patients with recent myocardial infarction: do stopped trials contribute to overall knowledge? GISSI Prevenzione Investigators (Gruppo Italiano per lo Studio della Sopravvivenza nell'Infarto Miocardico). *Italian heart journal : official journal of the Italian Federation of Cardiology*. 2000;1:810-20.
5. Major outcomes in moderately hypercholesterolemic, hypertensive patients randomized to pravastatin vs usual care: The Antihypertensive and Lipid-Lowering Treatment to Prevent Heart Attack Trial (ALLHAT-LLT). *Jama*. 2002;288:2998-3007.
6. Athyros VG, Papageorgiou AA, Mercouris BR, Athyrou VV, Symeonidis AN, Basayannis EO, Dimitriadis DS and Kontopoulos AG. Treatment with atorvastatin to the National Cholesterol Educational Program goal versus 'usual' care in secondary coronary heart disease prevention. The GREEK Atorvastatin and Coronary-heart-disease Evaluation (GREACE) study. *Current medical research and opinion*. 2002;18:220-8.
7. MRC/BHF Heart Protection Study of cholesterol lowering with simvastatin in 20,536 high-risk individuals: a randomised placebo-controlled trial. *Lancet*. 2002;360:7-22.
8. Shepherd J, Blauw GJ, Murphy MB, Bollen EL, Buckley BM, Cobbe SM, Ford I, Gaw A, Hyland M, Jukema JW, Kamper AM, Macfarlane PW, Meinders AE, Norrie J, Packard CJ, Perry IJ, Stott DJ, Sweeney BJ, Twomey C and Westendorp RG. Pravastatin in elderly individuals at risk of vascular disease (PROSPER): a randomised controlled trial. *Lancet*. 2002;360:1623-30.
9. Holdaas H, Fellstrom B, Jardine AG, Holme I, Nyberg G, Fauchald P, Gronhagen-Riska C, Madsen S, Neumayer HH, Cole E, Maes B, Ambuhl P, Olsson AG, Hartmann A, Solbu DO and Pedersen TR. Effect of fluvastatin on cardiac outcomes in renal transplant recipients: a multicentre, randomised, placebo-controlled trial. *Lancet*. 2003;361:2024-31.
10. Sever PS, Dahlof B, Poulter NR, Wedel H, Beevers G, Caulfield M, Collins R, Kjeldsen SE, Kristinsson A, McInnes GT, Mehlsen J, Nieminen M, O'Brien E and Ostergren J. Prevention of coronary and stroke events with atorvastatin in hypertensive patients who have average or lower-than-average cholesterol concentrations, in the Anglo-Scandinavian Cardiac Outcomes Trial--Lipid Lowering Arm (ASCOT-LLA): a multicentre randomised controlled trial. *Lancet*. 2003;361:1149-58.
11. Cannon CP, Braunwald E, McCabe CH, Rader DJ, Rouleau JL, Belder R, Joyal SV, Hill KA, Pfeffer MA and Skene AM. Intensive versus moderate lipid lowering with statins after acute coronary syndromes. *N Engl J Med*. 2004;350:1495-504.
12. Colhoun HM, Betteridge DJ, Durrington PN, Hitman GA, Neil HA, Livingstone SJ, Thomason MJ, Mackness MI, Charlton-Menys V, Fuller JH and investigators C. Primary prevention of cardiovascular disease with atorvastatin in type 2 diabetes in the Collaborative Atorvastatin Diabetes Study (CARDS): multicentre randomised placebo-controlled trial. *Lancet*. 2004;364:685-96.

13. Pedersen TR, Faergeman O, Kastelein JJ, Olsson AG, Tikkanen MJ, Holme I, Larsen ML, Bendixsen FS, Lindahl C, Szarek M and Tsai J. High-dose atorvastatin vs usual-dose simvastatin for secondary prevention after myocardial infarction: the IDEAL study: a randomized controlled trial. *Jama*. 2005;294:2437-45.
14. LaRosa JC, Grundy SM, Waters DD, Shear C, Barter P, Fruchart JC, Gotto AM, Greten H, Kastelein JJ, Shepherd J and Wenger NK. Intensive lipid lowering with atorvastatin in patients with stable coronary disease. *N Engl J Med*. 2005;352:1425-35.
15. Nakamura H, Arakawa K, Itakura H, Kitabatake A, Goto Y, Toyota T, Nakaya N, Nishimoto S, Muranaka M, Yamamoto A, Mizuno K and Ohashi Y. Primary prevention of cardiovascular disease with pravastatin in Japan (MEGA Study): a prospective randomised controlled trial. *Lancet*. 2006;368:1155-63.
16. Knopp RH, d'Emden M, Smilde JG and Pocock SJ. Efficacy and safety of atorvastatin in the prevention of cardiovascular end points in subjects with type 2 diabetes: the Atorvastatin Study for Prevention of Coronary Heart Disease Endpoints in non-insulin-dependent diabetes mellitus (ASPEN). *Diabetes care*. 2006;29:1478-85.
17. Amarenco P, Bogousslavsky J, Callahan A, 3rd, Goldstein LB, Hennerici M, Rudolph AE, Sillese H, Simunovic L, Szarek M, Welch KM and Zivin JA. High-dose atorvastatin after stroke or transient ischemic attack. *N Engl J Med*. 2006;355:549-59.
18. Ridker PM, Danielson E, Fonseca FA, Genest J, Gotto AM, Jr., Kastelein JJ, Koenig W, Libby P, Lorenzatti AJ, MacFadyen JG, Nordestgaard BG, Shepherd J, Willerson JT, Glynn RJ and Group JS. Rosuvastatin to prevent vascular events in men and women with elevated C-reactive protein. *N Engl J Med*. 2008;359:2195-207.
19. Armitage J, Bowman L, Wallendszus K, Bulbulia R, Rahimi K, Haynes R, Parish S, Peto R and Collins R. Intensive lowering of LDL cholesterol with 80 mg versus 20 mg simvastatin daily in 12,064 survivors of myocardial infarction: a double-blind randomised trial. *Lancet*. 2010;376:1658-69.
20. Yusuf S, Bosch J, Dagenais G, Zhu J, Xavier D, Liu L, Pais P, Lopez-Jaramillo P, Leiter LA, Dans A, Avezum A, Piegas LS, Parkhomenko A, Keltai K, Keltai M, Sliwa K, Peters RJ, Held C, Chazova I, Yusoff K, Lewis BS, Jansky P, Khunti K, Toff WD, Reid CM, Varigos J, Sanchez-Vallejo G, McKelvie R, Pogue J, Jung H, Gao P, Diaz R, Lonn E and Investigators H-. Cholesterol Lowering in Intermediate-Risk Persons without Cardiovascular Disease. *N Engl J Med*. 2016;374:2021-31.
21. Rossebo AB, Pedersen TR, Boman K, Brudi P, Chambers JB, Egstrup K, Gerds E, Gohlke-Barwolf C, Holme I, Kesaniemi YA, Malbecq W, Nienaber CA, Ray S, Skjaerpe T, Wachtell K and Willenheimer R. Intensive lipid lowering with simvastatin and ezetimibe in aortic stenosis. *N Engl J Med*. 2008;359:1343-56.
22. Baigent C, Landray MJ, Reith C, Emberson J, Wheeler DC, Tomson C, Wanner C, Krane V, Cass A, Craig J, Neal B, Jiang L, Hooi LS, Levin A, Agodoa L, Gaziano M, Kasiske B, Walker R, Massy ZA, Feldt-Rasmussen B, Krairitichai U, Ophascharoensuk V, Fellstrom B, Holdaas H, Tesar V, Wiecek A, Grobbee D, de Zeeuw D, Gronhagen-Riska C, Dasgupta T, Lewis D, Herrington W, Mafham M, Majoni W, Wallendszus K, Grimm R, Pedersen T, Tobert J, Armitage J, Baxter A, Bray C, Chen Y, Chen Z, Hill M, Knott C, Parish S, Simpson D, Sleight P, Young A and Collins R. The effects of lowering LDL cholesterol with simvastatin plus ezetimibe in patients with chronic kidney disease (Study of Heart and Renal Protection): a randomised placebo-controlled trial. *Lancet*. 2011;377:2181-92.
23. Cannon CP, Blazing MA, Giugliano RP, McCagg A, White JA, Theroux P, Darius H, Lewis BS, Ophuis TO, Jukema JW, De Ferrari GM, Ruzyllo W, De Lucca P, Im K, Bohula EA, Reist C, Wiviott SD, Tershakovec AM, Musliner TA, Braunwald E and Califf RM. Ezetimibe Added to Statin Therapy after Acute Coronary Syndromes. *N Engl J Med*. 2015;372:2387-97.

24. Robinson JG, Farnier M, Krempf M, Bergeron J, Luc G, Averna M, Stroes ES, Langslet G, Raal FJ, El Shahawy M, Koren MJ, Lepor NE, Lorenzato C, Pordy R, Chaudhari U and Kastelein JJ. Efficacy and safety of alirocumab in reducing lipids and cardiovascular events. *N Engl J Med.* 2015;372:1489-99.
25. Ridker PM, Revkin J, Amarenco P, Brunell R, Curto M, Civeira F, Flather M, Glynn RJ, Gregoire J, Jukema JW, Karpov Y, Kastelein JJP, Koenig W, Lorenzatti A, Manga P, Masiukiewicz U, Miller M, Mosterd A, Murin J, Nicolau JC, Nissen S, Ponikowski P, Santos RD, Schwartz PF, Soran H, White H, Wright RS, Vrablik M, Yunis C, Shear CL and Tardif JC. Cardiovascular Efficacy and Safety of Bococizumab in High-Risk Patients. *N Engl J Med.* 2017;376:1527-1539.
26. Sabatine MS, Giugliano RP, Keech AC, Honarpour N, Wiviott SD, Murphy SA, Kuder JF, Wang H, Liu T, Wasserman SM, Sever PS, Pedersen TR, Committee FS and Investigators. Evolocumab and Clinical Outcomes in Patients with Cardiovascular Disease. *N Engl J Med.* 2017;376:1713-1722.
27. Schwartz GG, Steg PG, Szarek M, Bhatt DL, Bittner VA, Diaz R, Edelberg JM, Goodman SG, Hanotin C, Harrington RA, Jukema JW, Lecorps G, Mahaffey KW, Moryusef A, Pordy R, Quintero K, Roe MT, Sasiela WJ, Tamby JF, Tricoci P, White HD, Zeiher AM, Committees OO and Investigators. Alirocumab and Cardiovascular Outcomes after Acute Coronary Syndrome. *N Engl J Med.* 2018;379:2097-2107.
28. Randomised trial of cholesterol lowering in 4444 patients with coronary heart disease: the Scandinavian Simvastatin Survival Study (4S). *Lancet.* 1994;344:1383-9.
